# 1 **Transcriptome analysis of *Plasmodium berghei* during** 2 **exo-erythrocytic development**

3  
4 Reto Caldelari\*<sup>1</sup>, Sunil Dogga<sup>2</sup>, Marc W. Schmid<sup>3</sup>, Blandine Franke-Fayard<sup>4</sup>, Chris J Janse<sup>4</sup>,  
5 Dominique Soldati-Favre<sup>2</sup> and Volker Heussler\*<sup>1</sup>

## 6 **Affiliations:**

7 <sup>1</sup>Institute of Cell Biology, University of Bern; Bern, Switzerland

8 <sup>2</sup>Department of Microbiology and Molecular Medicine, Faculty of Medicine, University of  
9 Geneva CMU, Switzerland.

10 <sup>3</sup>MWSchmid GmbH, Zurich, Switzerland

11 <sup>4</sup>Leiden Malaria Research Group, Department of Parasitology, Leiden University Medical  
12 Center, Leiden, The Netherlands

13

14 \*Corresponding authors: [reto.caldelari@izb.unibe.ch](mailto:reto.caldelari@izb.unibe.ch) and [volker.heussler@izb.unibe.ch](mailto:volker.heussler@izb.unibe.ch)

15

16

17

18

19

20

21

22 Short title: Transcriptome of malaria liver development

23

24 **Key words: Malaria, life cycle, Plasmodium liver stage, transcriptome, RNA-seq,**  
25 **merosome.**

## 26 **Summary**

27 The complex life cycle of malaria parasites requires well-orchestrated stage specific gene  
28 expression. In the vertebrate host the parasites grow and multiply by schizogony in two  
29 different environments: within erythrocytes and within hepatocytes. Whereas erythrocytic  
30 parasites are rather well-studied in this respect, relatively little is known about the exo-  
31 erythrocytic stages. In an attempt to fill this gap, we performed genome wide RNA-seq  
32 analyses of various exo-erythrocytic stages of *Plasmodium berghei* including sporozoites,  
33 samples from a time-course of liver stage development and detached cells, which contain  
34 infectious merozoites and represent the final step in exo-erythrocytic development. The  
35 analysis represents the completion of the transcriptome of the entire life cycle of *P. berghei*  
36 parasites with temporal detailed analysis of the liver stage allowing segmentation of the  
37 transcriptome across the progression of the life cycle. We have used these RNA-seq data  
38 from different developmental stages to cluster genes with similar expression profiles, in  
39 order to infer their functions. A comparison with published data of other parasite stages  
40 confirmed stage-specific gene expression and revealed numerous genes that are expressed  
41 differentially in blood and exo-erythrocytic stages. One of the most exo-erythrocytic stage-  
42 specific genes was PBANKA\_1003900, which has previously been annotated as a  
43 “gametocyte specific protein”. The promoter of this gene drove high GFP expression in exo-  
44 erythrocytic stages, confirming its expression profile seen by RNA-seq. The comparative  
45 analysis of the genome wide mRNA expression profiles of erythrocytic and different exo-  
46 erythrocytic stages improves our understanding of gene regulation of *Plasmodium* parasites  
47 and can be used to model exo-erythrocytic stage metabolic networks and identify  
48 differences in metabolic processes during schizogony in erythrocytes and hepatocytes.

## 49 Introduction

50 Malaria is a devastating disease caused by apicomplexan parasite *Plasmodium species*.  
51 Almost half of the world's population is permanently at risk of malaria resulting in over 200  
52 Million malaria cases worldwide mostly in African countries. There were more than 400,000  
53 deaths in 2017 (1), majority of which were of children under the age of five.

54 The life cycle of *Plasmodium* parasites involves the injection of sporozoites into the  
55 vertebrate host during a blood meal of an infected female mosquito. For the rodent parasite  
56 *P. berghei* it has been shown that a proportion of injected sporozoites actively invade blood  
57 vessels and then are passively transported to the liver (2). After crossing the blood vessel  
58 endothelia in the liver to reach the parenchyma, the parasite transmigrates through several  
59 hepatocytes before it settles in one. While entering the ultimate host cell, the host plasma  
60 membrane invaginates forming a parasitophorous vacuole (PV) in which the parasite resides,  
61 develops and multiplies by exo-erythrocytic schizogony. The intracellular parasite extensively  
62 remodels the parasitophorous vacuole membrane (PVM), in particular by excluding or  
63 removing host cell proteins and incorporating parasite proteins (3).

64 Each exo-erythrocytic stage parasite (EEF: exo-erythrocytic form) generates tens of  
65 thousands of nuclei by the process of exo-erythrocytic schizogony. This rapid nuclear division  
66 is accompanied by growth and replication of organelles including the Golgi apparatus,  
67 endoplasmic reticulum, mitochondrion and apicoplast and by the vast expansion of the  
68 plasma membrane (4–6). Nuclei and organelles are eventually segregated into individual  
69 merozoites. Once EEF merozoites have completed their development, the PVM ruptures.  
70 This process requires an orchestrated action of multiple *Plasmodium* proteins such as lipases  
71 (e.g. PbPL (7)) and proteases (e.g. SUB1 (8,9) and possibly perforins (as shown for  
72 erythrocytic stage parasites (EF: erythrocytic form) (10–12). Upon rupture of the PVM, EEF  
73 merozoites disperse in the host cell cytoplasm and the host cell actin cytoskeleton collapses  
74 (13). *In vitro*, the final developmental stage of the EEF are detached cells (DC) and  
75 merozoites, host cell plasma membrane enclosed merozoites (14,15). *In vivo*, upon PVM  
76 rupture, infected cells become excluded from the liver tissue and merozoites are formed  
77 and pushed into the lumen of adjacent blood vessels. At tissue sites with small capillaries,  
78 merozoites rupture to release merozoites into the blood (16). Liberated merozoites  
79 immediately invade red blood cells (RBC), where they undergo repeated asexual  
80 reproduction cycles. In contrast to the tens of thousands merozoites generated by a single  
81 EEF, within erythrocytes the parasites produce only a limited number (12 to 32) merozoites  
82 by erythrocytic schizogony. Another difference between erythrocytic and exo-erythrocytic  
83 schizogony is that after rupture of the PVM the EEF merozoites can reside in the host cell  
84 cytoplasm for up to several hours, whereas EF merozoites are liberated from the PVM and  
85 the host cell plasma membrane almost simultaneously (17). Some EF will differentiate into  
86 male and female gametocytes. When these are ingested by a mosquito during a blood meal,  
87 they mature into macro- and micro-gametes and are liberated from the RBC. These sexual  
88 forms fuse to form zygotes and transform into motile ookinetes, which are able to cross the

89 midgut epithelium of the mosquito to develop into oocysts, in which thousands of  
90 sporozoites are formed. After about 9-16 days (depending on the parasite species and the  
91 environmental temperature), sporozoites are liberated and invade the salivary glands of the  
92 mosquito (reviewed in (18)), whereupon they are then ready to be injected into a host  
93 during the next blood meal.

94 Studying the entire life cycle using human parasites under live or laboratory conditions is  
95 difficult due to ethical and safety reasons. However, the use of model organisms, such as the  
96 rodent malaria parasite *P. berghei* is experimentally tractable, to investigate the EEF  
97 development and fill gaps of knowledge that might also be relevant for human *Plasmodium*  
98 species. In addition, genetic manipulation of *P. berghei* is relatively easy and well established  
99 (19–21).

100 Many transcriptomic studies have been undertaken for different *Plasmodium* species, either  
101 by array or RNA-seq. **Table 1** lists transcriptomic data implemented in PlasmoDB (22).  
102 Recently, single cell transcriptomic profiles have also been published for EF of *P. falciparum*  
103 (23,24). However, of all of these studies, only two include the transcriptome of EEF parasites,  
104 one of which was done using the rodent parasite *Plasmodium yoelii* (25) and the other using  
105 *P. vivax* with emphasis on the dormant parasite stage, the hypnozoite (26). Since *P. berghei*  
106 is a widely used model in malaria research and quantitative data are missing for its EEF  
107 stages, we performed genome wide RNA-seq analyses of EEF development in a time course  
108 and compared expression data to already published data of gene-expression of other life  
109 cycle stages of *P. berghei*. In particular, we compared EEF merozoites originating from DC  
110 and EF merozoites (from *in vitro* cultivated schizonts). Remarkably, we found that their  
111 transcription profiles differ substantially and identified differences in metabolic processes  
112 during schizogony in erythrocytes and hepatocytes despite the fact that both types of  
113 merozoites infect RBC.

114

## 115 **Results and Discussion**

### 116 **High fidelity exo-erythrocytic stage RNA-seq data and sample selection criteria**

117 We infected HeLa cells with *P. berghei* sporozoites that express mCherry under the control  
118 of a constitutive Hsp70 promoter, allowing the detection of fluorescent parasites in all  
119 developmental stages (7). Exo-erythrocytic form (EEF) parasites were isolated at different  
120 time-points of infection by FACS sorting (6 hours (h), 24 h, 48 h, 54 h and 60 h). At 69 h  
121 detached cells (DC) were collected from the culture medium supernatant. To preserve RNA  
122 integrity during FACS sorting of infected cells, cells were treated with RNAlater (27,28). In  
123 addition, sporozoite samples were generated by processing infected salivary glands of  
124 mosquitoes at day 20 post feeding. For each sample independent biological duplicates were  
125 collected. Following the isolation of RNA from infected HeLa cells and from infected salivary  
126 glands, libraries were sequenced with an Illumina HiSeq 2500 resulting in 34 to 61 million  
127 paired-end reads per sample (**Table S1**). After removal of low quality sequences, sequencing

128 adapters and sequences arising from host RNA, reads were aligned to the *P. berghei* ANKA  
129 reference genome, resulting in around 0.23 to 21.4 million weighted alignments (in the  
130 following termed "hits", see (29) and (30) for details) within genic regions (**Table S1**, raw  
131 counts are provided in **Table S2**). Samples collected 6 hours after infection were excluded  
132 from further analysis as only low amounts of hits were recovered (22,154 and 35,312 hits) in  
133 both biological replicates. The reason is most likely that, at this time-point of infection,  
134 parasite transcripts represent only a small fraction in comparison to host cell transcripts.

135 We identified 4475 transcribed genes ( $\geq 80$  normalized read counts, corresponding on  
136 average to 20 RPKMs) in at least one developmental stage of the EEF. In a previously  
137 reported transcriptome analysis of *P. yoelii* EEF stages using array technology, about 2000  
138 genes were detected (25). This exemplifies the higher sensitivity of the Next Generation  
139 Sequencing (NGS) compared to array technology (29).

140

141 A hierarchical clustering of the different EEF samples together with RNA-seq data of EF  
142 (rings, trophozoites and schizonts harvested 4, 16 and 22 hours after infection of RBC), as  
143 well as with RNA-seq data of gametocytes and ookinetes (31) was done. The replicates  
144 correlated (Spearman's correlation) highly to each other and the different stages grouped  
145 well according to the host environment (exo-erythrocytic, erythrocytic) (**Fig. 1**).

146 The analysis revealed that the mRNA expression profiles of the extracellular ookinetes and  
147 sporozoites cluster together, which might be due to the fact that both are motile stages that  
148 traverse mosquito host cells. Ookinetes and sporozoites are, however, markedly different  
149 from the profiles of EEF and asexual EF stages. Notably, the expression profile of  
150 gametocytes is different from both EEF and asexual EF stages but shows similarities to the  
151 ookinetes. This is not surprising as gametocytes and ookinetes are consecutive stages in the  
152 life cycle. In female gametocytes many different mRNAs are already produced that are  
153 translationally repressed and are only used during development of the zygote and ookinete  
154 (32–34). Among the EEF stages, the highest similarities of mRNA expression profiles were  
155 observed as expected for adjacent stages/timepoints (e.g., 48 h and 54 h). However, the  
156 early stages/timepoints (24 h, 48 h and 54 h) were fairly distinct from the later time-points  
157 (60 h and detached cells). The asexual EF stages showed a rather high degree of similarity  
158 among them. In fact, the mRNA expression profile of detached cells, containing the EEF  
159 merozoites, was rather distinct from the profile of EF merozoites, although both need to be  
160 prepared to invade RBC. It is noteworthy that proteomics data of *P. yoelii*, revealed that 90%  
161 of the proteins of late EEF were also detected in the early EF (25).

162 To verify the RNAseq data, we compared the expression pattern of selected genes to  
163 previously reported expression patterns. The expression pattern of genes coding for  
164 housekeeping proteins (GAPDH, actin 1 and alpha-tubulin 1; **Fig. S1**), putative proteases  
165 (SERA 1 to 5; **Fig. S2**), PVM proteins (EXP1, Exp2, UIS3 and UIS4; **Fig. S3**), sporozoite surface  
166 proteins (CSP and TRAP; **Fig. S4**), fatty acid biosynthesis enzymes (FabB/F, FabI, FabZ and

167 FabG, **Fig. S5**) as well as merozoite surface proteins (MSP 1, 4/5, 7, 8, 9, 10; **Fig. S6**) were  
168 very similar to the already published data confirming the quality of the here presented RNA-  
169 seq data. For further information about the selected genes presented in **Fig. S1** to **Fig. S6**,  
170 the interested reader is referred to the supplementary information section.

171 An important aspect of the current RNA-seq analysis was that the expression profiles provide  
172 valuable information for the choice of promoters to drive expression of transgenes, such as  
173 fluorescent or luminescent reporter proteins. Previously, the promoters of the housekeeping  
174 genes heat shock protein (*hsp70*) and eukaryotic elongation factor 1 $\alpha$  (*eef1 $\alpha$* ) have been  
175 used to drive expression of fluorescent reporters (7,35,36). According to our RNA-seq  
176 analysis, the *hsp70* promoter is a better choice for driving constitutive expression of  
177 reporters as *hsp70* mRNA exhibits a more uniform expression profile compared to *eef1 $\alpha$*   
178 mRNA (**Fig. S7**).

179 We next aimed for a more detailed computational analysis of the exo-erythrocytic stage  
180 transcriptome and a comparison with other developmental stages.

181

## 182 **Gene co-expression network**

183 To further explore the complexity of the parasite transcriptome, in particular the gene  
184 expression similarities among the different developmental stages, a gene co-expression  
185 network (GCN) was computed (37) and genes with similar expression patterns  
186 ("communities")(38) were extracted and visualized (**Fig. 2**). With this analysis, we gained  
187 insight into similarly expressed genes in the different EEF and EF stages and into  
188 characteristic expression patterns within the entire transcriptome. We used these analyses  
189 to find functionally related genes based on similar expression patterns.

190 The GCN analysis revealed 14 different communities comprised of 11 to 818 genes and a  
191 "mixed" community with 197 genes (a pool of communities with 10 or less genes per  
192 community) (**Fig. 2, Table S4**). Of a total of 5104 genes, 4675 genes are represented in the  
193 GCN. 429 genes did not meet the GCN criteria, as the expression pattern of each of them did  
194 not significantly correlate to the expression pattern of another gene throughout all stages.  
195 Interestingly, the GCN analysis indicated marked differences between EEF and EF.  
196 Surprisingly, even the transcriptome of EEF-derived and EF-derived merozoites (i.e.,  
197 detached cells and late blood schizonts) were found to differ substantially. The 486  
198 transcribed genes of community 1 were strongly expressed in DC, which contain EEF-derived  
199 merozoites and extended into the ring stage (initial phase of EF development). The 596  
200 transcribed genes of community 2 were as well enriched in DC, but expression of these  
201 genes persisted longer during the EF (into trophozoite and partly into schizont stage)  
202 whereas expression was strongly reduced in the sporozoites. To functionally characterize the  
203 communities defined in the GCN, we tested for enrichment of gene ontology (GO) terms  
204 from the domain "Biological Process (BP)" (**Fig. 3, Table S3** for additional information).

205 The first two communities in **Fig. 2** contain genes that are expressed specifically in DC and EF  
206 stages. The majority of the corresponding gene products were predicted to be involved in  
207 gene expression, ribosome biogenesis and transcription (Community 1, **Fig. 3**) or in mRNA  
208 processing and translation (Community 2, **Fig. 3**). All these functions are involved in  
209 DNA/RNA biology, in particular in (regulation of) gene expression. This is not surprising as  
210 invasive forms like the merozoites in DC prepare for the next growth phase after invasion  
211 and most likely need stored transcripts for a rapid protein synthesis after invasion of  
212 erythrocytes, comparable to storage of (repressed) transcripts in mature gametocytes and  
213 sporozoites (32–34,39–43). On the other hand, the 160 genes of community 3 were highly  
214 specific to the EF stages (**Fig. 3**). Conspicuously, this community has almost no GO-term  
215 annotations for biological processes (only 3 out of 160 genes were annotated). However, this  
216 community was highly enriched for small nucleolar RNAs (snoRNAs), PIR pseudogenes  
217 (*Plasmodium* interspersed repeat pseudo genes) and genes of the three large multigene  
218 families in rodent parasites, coding for PIR proteins, fam-a proteins and fam-b proteins.  
219 SnoRNAs are important components of ribosome biogenesis. They are non-coding RNAs with  
220 a diversity of function like pseudo-uridylation and 2'-O- methylation of RNAs or synthesis of  
221 telomeric DNA (44). PIR, fam-a and fam-b proteins are exported by EF stages into the  
222 cytoplasm of the host erythrocyte. The function of most of these proteins is unknown,  
223 although evidence has been presented for a role of PIRs in erythrocyte sequestration.  
224 Recently it has been shown that a subset of PIR, fam-a and fam-b proteins are also expressed  
225 in EEF stages (45).

226 Community 6, consisting of 776 genes, was enriched for genes expressed in sporozoites, but  
227 also frequently expressed at elevated levels in gametocytes, ookinetes and schizonts. Not  
228 surprisingly, genes preferentially expressed in sporozoites, gametocytes and ookinetes  
229 (community 6, **Fig. 3**) were involved in host cell entry, host cell exit and parasite motility. In  
230 addition, genes that are involved in transport of subcellular components and DNA repair  
231 were present. Genes whose expression was found to be more specific to sporozoites, with  
232 persisting expression during the early EEF stages (community 5, **Fig. 3**), were involved in DNA  
233 synthesis and metabolic processes, consistent with the high multiplication observed  
234 following hepatocyte invasion by the sporozoites.

235 Communities 7, 8 and 9 contain 45 genes in total, the expression of which were mostly  
236 specific to the developing EEF stages. According to guidelines of the Broad Institute on  
237 GeneSetEnrichmentAnalysis, small size communities should not be interpreted.

238 The expression of the 31 genes of community 10 was enriched in EF schizonts and in  
239 gametocytes, but these genes were also found well expressed in late EEF stages. Although  
240 the GO term 'DNA metabolic process' is listed for this community, it should be assessed with  
241 caution due to the reason mentioned above.

242 The 176 genes of community 11 were expressed during the developing EEF and EF stages,  
243 with a slight bias towards the developing EEF stages (85% of all genes in the community  
244 were on average expressed at a higher level in the EEF stages). In this community, 3 out of 9  
245 genes of fatty acid biosynthesis have been identified as hits. This is in agreement with the

246 high fatty acid usage of EEF stages to generate various parasite membranes (46). Apart from  
247 genes involved in fatty acid biosynthesis, it is very likely that genes identified in this  
248 community are involved in schizogony and merozoite development in both EEF and EF  
249 stages.

250 The remaining communities were mostly defined by genes with almost complete absence of  
251 expression in sporozoites (community 12; 499 genes), in sporozoites and DC (community 13;  
252 480 genes) or in sporozoites, 24 h EEF stage and partly DC (community 14; 818 genes).  
253 However, whereas genes of community 12 and 13 were generally expressed throughout the  
254 EEF and the EF stages, genes of community 14 were more specific to gametocytes and  
255 ookinetes (**Fig. 2**). Sporozoites are not growing or proliferating and therefore it can be  
256 expected that in sporozoites, expression of genes involved in several metabolic processes,  
257 protein lipidation, phosphorylation and signal peptide processing is less pronounced than in  
258 other stages.

259 Altogether, we could identify 14 clearly defined communities and a pool of small  
260 communities (mix) with totally 4675 genes attributed (see supplemental **Table S4** for  
261 GeneIDs of the members of the communities and for genes excluded during the GCN  
262 analysis).

263 The generated GCN provides a first comprehensive overview of gene regulation in a  
264 *Plasmodium* parasite throughout EEF and EF development including several life cycle stages  
265 in the mosquito vector (ookinetes, sporozoites). The identification of clear communities of  
266 genes with comparable expression profiles may help identifying common signatures in the  
267 untranslated promotor regions that may be involved in regulation of gene expression.

268

## 269 **Differences in gene expression between developing exo-erythrocytic and erythrocytic** 270 **parasites**

271 To better elucidate the differences between EEF and EF stage parasites, we performed  
272 differential expression analyses. Firstly, the average gene expression of developing EEF  
273 stages (24 h, 48 h, 54 h and 60 h) was compared with developing EF stages (ring 4h,  
274 trophozoite 16 h. In this comparison, 299 genes were significantly upregulated in the EEF  
275 stages ( $\text{LogFC} \geq 2$ ,  $\text{adjP} \leq 0.01$ ) and 392 genes were significantly upregulated in the EF stages  
276 (**Fig. 4; Table S5**). GO-term enrichment (summarized in **Table 2**) revealed that genes  
277 preferentially expressed in the EEF stages were enriched in fatty acid biosynthesis (e.g.  
278 *fabB/fabF* in **Fig. 4**), entry into the host cell, leading strand elongation, tetrapyrrol  
279 biosynthesis and DNA replication. Considering that a single *P. berghei* EEF stage parasite  
280 generates more than 10,000 merozoites and an individual EF stage parasite only 12-18, an  
281 enrichment of expression in genes associated with fatty acid biosynthesis and DNA  
282 replication is expected and has already been confirmed in different studies (47,48) and  
283 reviewed in (49). In contrast, genes preferentially expressed in the EF stages were enriched  
284 for the GO terms for cell motility and intracellular, organellar transport (summarized as  
285 “movement of cell or subcellular components”), protein export into host cell cytoplasm, exit



286 from host cell and pathogenesis. Enrichment of gene expression related to translocation of  
287 proteins (e.g. membrane associated histidine-rich protein 1: *mahrp1a* & *b* in **Fig. 4**) across  
288 the PVM is also required for parasite remodeling of the host RBC (50), including proteins  
289 transported to the surface of the RBC involved in RBC sequestration (50–52). Many *P.*  
290 *berghei* proteins are known that are transported into the host red blood cell (45,52) whereas  
291 only a few proteins have been identified that are transported into the host hepatocyte, for  
292 example, CSP (53,54) and LISP2 (55).

293

#### 294 **Exo-erythrocytic and erythrocytic merozoites: same but different**

295 In contrast to the limited differences in gene expression seen during parasite development in  
296 hepatocytes and RBC, the differences between EEF and EF merozoites were much more  
297 pronounced (i.e. DC and the EF schizonts at 22 h) even though the 22h schizont sample was  
298 not entirely pure but also contained some immature schizonts and a small amount of  
299 gametocytes (31). 880 and 1275 genes were preferentially expressed in DC and in 22 h  
300 schizonts, respectively (**Fig. 5** and **Table S6**). Analysis of GO-term enrichment (**Table 3**)  
301 indicated clear differences between these sets. Genes preferentially expressed in the DC  
302 were found enriched for the GO-terms: gene expression, ribosome biogenesis, amide  
303 biosynthetic process, RNA biosynthetic process and mRNA splicing. In contrast, genes  
304 preferentially expressed in 22 h schizonts were enriched for the GO-terms: small GTPase-  
305 mediated signal transduction, DNA replication and recombination, protein localization and  
306 modification, and signal peptide processing. At first glance, it is rather surprising that  
307 merozoites derived from EEF and EF stage differ so markedly. However, it might reflect the  
308 fact that the mechanism of egress from their respective host cells is different. EF stage-  
309 derived merozoites almost simultaneously rupture the PVM and the plasma membrane of  
310 the RBC (17). On the other hand, EEF stage-derived merozoites are initially liberated from  
311 the PVM but can then stay for several hours in the host cell until they are extruded as  
312 merosomes, into a blood vessel (7,14) and eventually released in the fine capillaries of the  
313 lungs (16). Also, DC/merosomes do not form synchronously. *In vitro*, detached cell  
314 generation starts as early as 54 h, peaks at 65 h but continues until 69 h and even later. Since  
315 for the current study DC/merosomes were collected at 69 h to increase the yield, merozoites  
316 might be at different developmental and activation stages and thus might express different  
317 sets of genes. In the next section, we focus in more detail on genes involved in the egress of  
318 EEF stage-derived merozoites in comparison to EF stage-derived merozoites.

319

#### 320 **Comparison of mRNA expression patterns at the end of exo-erythrocytic and erythrocytic** 321 **stage development**

322 Given that EF merozoite egress within minutes upon PVM rupture, whereas EEF merozoites  
323 remain in the hepatocyte cytoplasm for up to several hours, we searched for genes that  
324 might be i) necessary for the rapid egress specifically from RBC, ii) required for survival in the  
325 hepatocyte cytoplasm and iii) specific for both developmental stages (i.e. necessary for PVM

326 rupture in RBC and hepatocytes). Interestingly, 74 genes were upregulated in 22h EF  
327 schizonts in comparison to EEF samples ( $\text{LogFC} \geq 2$ ,  $\text{adjP} \leq 0.01$ , **Table S7**), but only four of  
328 these were upregulated when compared to all other stages (**Table S8**). These four genes  
329 code for the following proteins: i) the high mobility group protein B1 (PBANKA\_0601900) of  
330 which the orthologue in *P. falciparum* has been shown to potently activate pro-inflammatory  
331 cytokines, suggesting a role in triggering host inflammatory immune responses (56); ii) a  
332 protein of the PIR multigene family (PBANKA\_0500781); the function of PIRs is not known  
333 but these proteins are believed to be involved in antigenic variation and evasion from host  
334 immune responses (57); iii) a conserved *Plasmodium* protein of unknown function  
335 (PBANKA\_0915200); iv) MSP9 (Merozoite surface protein 9, PBANKA\_1443300). The  
336 orthologue of MSP9 in *P. falciparum* has been shown to bind to erythrocyte band 3 protein  
337 and to form a complex with MSP1 (58,59). *P. falciparum* merozoites are able to infect RBC  
338 via two different invasion mechanisms: one is sialic acid-dependent, involving MSP9 and the  
339 other one is MSP9 and sialic acid-independent. Interestingly MSP9 at a transcriptional level  
340 is barely expressed in DC and also hardly in other developmental EEF stages, which might be  
341 indicative that EEF stage-derived merozoites may not invade via the sialic acid-dependent  
342 mechanism. Attempts to knock out *P. berghei* MSP9 were not successful (60). In *P. yoelii*,  
343 MSP9 has been found in the erythrocyte cytoplasm (61) and might, in addition to invasion,  
344 also be involved in egress of merozoites from RBC.

345 Thereafter, we searched for genes that are specifically upregulated in DC when compared to  
346 all other stages and identified 293 genes (**Table S9**). It is conceivable that most of these are  
347 involved in the EEF stage-specific egress, in parasite survival in the dying host hepatocyte or  
348 in early RBC remodeling. As discussed earlier, it is plausible that transcripts are  
349 translationally suppressed in merozoites until the next stage in the life cycle, like has been  
350 described for mature gametocytes and sporozoites (33,62). Among the highly upregulated  
351 transcripts, *sbp1* (skeleton binding protein 1) (PBANKA\_1101300), *mahrp1a* and *mahrp1b*  
352 (PBANKA\_1145800 and PBANKA\_1145900) were identified. These gene products are all  
353 involved in the trafficking of exported proteins from the parasite to the surface of the RBC  
354 (50). Knock out of MAHRP1a or SBP1 reduced the sequestration of infected cells (50). It is  
355 plausible that EEF stage-derived merozoites express high levels of these mRNAs in order to  
356 sufficiently express these proteins immediately after infection of RBC. Plausibly, this may  
357 allow the infected RBC to be efficiently sequestered in the periphery to avoid immediate  
358 clearance by the spleen. Why expression of *sbp1* and *mahrp1a* and *mahrp1b* appears to be  
359 lower in EF stage merozoites than in EEF stage merozoites is unknown. One reason might  
360 be, that in course of EF stage infection, the spleen is heavily remodeled (63–65) and allows  
361 for passage of infected RBC, making an efficient sequestration and thus a pronounced  
362 expression of sequestration ligands on the surface of the infected RBC less necessary (50).  
363 The parasite might thus be less dependent on intense trafficking of sequestration ligands.  
364 Another reason might be that MAHRP1a and SBP1 are already expressed during ring and  
365 trophozoite stage and thus less transcript would be needed to fulfill the same function as in  
366 EEF.

367

### 368 Genes predominantly expressed in exo-erythrocytic stages

369 One of the goals of this study was to identify EEF stage-specific expressed genes. The EEF  
370 data were therefore compared with data from all other stages. The comparison revealed 5  
371 highly specifically expressed transcripts for EEF stages with a LogFC >6 and adjP <0.01. (**Fig.**  
372 **6**). The genes *lisp1* (PBANKA\_1024600) and *lisp2* (PBANKA\_1003000) have been previously  
373 reported to be expressed exclusively during EEF stage development (65–67). This is clearly  
374 reflected by our RNA-seq analysis where substantial *lisp1* and *lisp2* mRNA levels were only  
375 found in EEF stages, from 24hpi to DC. Along with *lisp1* and *lisp2* we identified two  
376 conserved *Plasmodium* genes (PBANKA\_0518900 and PBANKA\_0519500), one of which is  
377 annotated as membrane protein, although there is no transmembrane domain other than  
378 the signal peptide (PBANKA\_0518900). The fifth gene in this EEF-specific group of genes is  
379 PBANKA\_1003900. An averaged logFC of PBANKA\_1003900 from later stages compared to  
380 non-EEF stages was similarly high as for *lisp2* and *lisp1* (**Table 4**). PBANKA\_1003900 is a  
381 syntenic ortholog of *P. falciparum* sexual stage-specific protein precursor (Pfs16;  
382 PF3D7\_0406200) which is expressed early during of development of *P. falciparum*  
383 gametocytes (68). *P. berghei* parasites expressing an mCherry-tagged PBANKA\_1003900  
384 provided experimental evidence that this gene is also expressed in gametocytes and was  
385 therefore annotated as a gametocyte specific protein (69). However, substantial  
386 PBANKA\_1003900 transcript levels were only detected in EEF stages. We generated a  
387 transgenic parasite line expressing GFP under the control of the promoter of  
388 PBANKA\_1003900 (PBANKA\_1003900<sup>GFP</sup>) and analyzed GFP expression by fluorescence  
389 microscopy in the different EEF and EF stages. We could not detect GFP in any of the EF  
390 stages, including gametocytes. In contrast, GFP expression was detected by fluorescence  
391 microscopy of infected HeLa cells fixed at different time points (**Fig. 7**; 24h, 48h, 54h, 60h).  
392 At 24h of EEF stage development no or only very weak GFP-fluorescence was detectable. At  
393 48h of EEF stage development, the signal was readily visible and at 54h and 60h post  
394 infection the fluorescent signal was profoundly intense. When performing live cell imaging,  
395 we observed the first signals at 30h post infection (**Movie 1**, starting from 30hpi). From 45h  
396 onwards the protein was substantially expressed confirming the results obtained from fixed  
397 cells. These fluorescence patterns (fixed and live) nicely confirmed our RNA-seq data during  
398 EEF stage development. Interestingly, analyses of gene-deletion mutants lacking  
399 PBANKA\_1003900 demonstrated that the gene is not essential at any developmental stage  
400 throughout the complete parasite life cycle ((69) and own unpublished data). According to  
401 the expression profile deduced from the RNA seq analysis and also confirmed by the  
402 promoter analyses, we propose to revise the annotation of this gene “gametocyte specific  
403 protein” and to rename it as “liver specific protein 3 (LISP3)”.

404

## 405 **Conclusion**

406 We present here the first time-course transcriptome of the exo-erythrocytic stages of *P.*  
407 *berghei* by RNA-seq. This allowed an extended comparative gene transcription analysis of  
408 the exo-erythrocytic stages with published genome wide transcription analyses of  
409 erythrocytic stages, both asexual and sexual erythrocytic stages as well as ookinetes. This  
410 offers a comprehensive overview of gene transcription throughout most of the life cycle and  
411 allows a better understanding of gene regulation in different life cycle stages. In particular,  
412 the transcriptome of these different life cycle stages provide an invaluable tool for systems  
413 biology approaches to model metabolic pathways that are essential in different steps of the  
414 *Plasmodium* life cycle. In a first attempt to analyze transcription profiles during the  
415 *Plasmodium* life cycle, we have segmented almost 4700 genes into 14 distinct communities  
416 based on their different expression profile and attributed gene ontology terms to the  
417 individual communities. A more detailed analysis of the promoter regions of the genes in the  
418 communities with similar expression profiles could help identifying common DNA domains  
419 that might support our further understanding of regulation of gene expression in  
420 *Plasmodium*. We believe that the RNA-seq data provided here are of great interest for  
421 fundamental research questions with respect to parasite biology as well as for applied  
422 research aiming to identify new protein targets for vaccine and drug development.

423

## 424 **Acknowledgments**

425 FACS sorting was performed at the Cytometry Laboratory Core facility of the University of  
426 Bern; we are thankful for the kind support by Stefan Müller. RNA-sequencing was performed  
427 at the iGE3 genomics platform of the University of Geneva

428

## 429 **Funding**

430 DSF and VH were supported by the RTD grant MalarX (grant number: 51RTPO\_151032),  
431 within SystemsX.ch (the Swiss Initiative for Systems Biology  
432 <http://www.systemsx.ch/projects/research-technology-and-development-projects/malarx/>)

433

## 434 **Experimental Procedures**

### 435 **Mice, Parasites, Infections**

436 Experiments were performed in accordance with the guidelines of the Swiss Act on animal  
437 protection (TSchG) and approved by the animal experimentation commission of the canton  
438 Bern (authorization numbers BE109/13 and BE132/16). The generation of the parasite line  
439 expressing GFP under the promoter of PBANKA\_1003900 was approved by the Animal  
440 Experiments Committee of the Leiden University Medical Center (DEC 12042). The Dutch  
441 Experiments on Animal Act is established under European guidelines (EU directive no.

442 86/609/EEC regarding the Protection of Animals used for Experimental and Other Scientific  
443 Purposes).

444 BALB/c mice used for mosquito infections were between 6-10 weeks of age and were  
445 purchased from the Central animal facility at University of Bern, Harlan (Horst, the  
446 Netherlands) or Janvier Labs (Le Genest Saint Isle, France).

447 For RNA work: Mice were infected by intraperitoneal injection of blood stabilates of marker-  
448 free *P. berghei* ANKA expressing mCherry under the control of hsp70 regulatory sequences  
449 (PbmCherry<sub>hsp70</sub>) (7). At parasitemia of ~4%, the mouse was bled and 40 µl of infected blood  
450 was injected intravenously into phenylhydrazine treated mice (200ul of 6mg/ml in PBS, 2-3  
451 days before). At day 3 to 4 after infection, each mouse with at least 7% parasitemia was  
452 anaesthetized with Ketazol/Xylasol and exposed to ~150 female *Anopheles stephensi*  
453 mosquitos (which were sugar starved for 5h). Mosquitoes were kept at 20.5°C and 80%  
454 humidity. From day 16-26 post infection salivary glands of infected mosquitos (sorted by  
455 fluorescence stereomicroscope *Olympus SZX10/ U-HGLGPS*) were dissected into serum free  
456 IMDM (*Iscove's Modified Dulbecco's Medium, Sigma-aldrich*). Sporozoites were liberated  
457 from the glands and were used to infect confluent confluent HeLa cells (per time point 10  
458 wells of 96well plates were seeded wit 40'000 cells/well the day before). Each well was  
459 infected with ~ 20'000 PbmCherry<sub>hsp70</sub> sporozoites for 6h. The cells were detached by the  
460 use of accutase (Innovative Cell Technology), pooled and the equivalent of 10 wells were  
461 seeded in 25cm<sup>2</sup> cell culture flask. 1/6<sup>th</sup> of the cells was washed once with PBS and pelleted  
462 by centrifugation (2min 100g). The pellet was loosened by flicking and the cells were  
463 resuspended with 250ul of RNeasy lysis buffer and stored at 4°C till all time points were harvested. It  
464 has been reported that RFP in contrast to GFP is preserved in RNeasy treated cells (28).

465 Media of the cultured cells were changed at 24hpi and 48hpi. At the respective time points  
466 the cells were detached from the surface by the use of accutase, washed once with PBS and  
467 then resuspended in 250ul RNeasy lysis buffer and stored at 4°C. With the use of RNeasy lysis  
468 buffer we could shorten the time in unnatural status not being in the incubator in adequate environment and  
469 medium) down to 10minutes compared to 1-2 hours in case of sorting fresh cells.

470 To generate transgenic parasites expressing *gfp* under control of the promoter of  
471 PBANKA\_1003900 (PBANKA\_1003900<sup>GFP</sup>), construct PbGFPcon vector was used (35). First,  
472 the PBANKA\_1003900 promoter (1.7 kb) was amplified using primers  
473 GCTCTACCAATTTTGTGTAC and GGATCCTAAAAATTAATTTTGTATAAAATCG and cloned into  
474 pCR2.1-TOPO vector (Invitrogen) and sequenced. Then the *P. berghei elongation factor-1α*  
475 promoter of PbGFPcon was exchanged for the PBANKA\_1003900 promoter (EcoRV from  
476 pCR2.1-TOPO vector /BamHI) and the *gfp* gene was re-introduced in the correct orientation  
477 as a BamHI fragment. Finally the construct was used to transfect the reference wild type *P.*  
478 *berghei* ANKA parasite line (cl15cy1 (ANKAw1))(19) to generate line 300  
479 (PBANKA\_1003900<sup>GFP</sup>). Transfection with episomal construct and positive selection of  
480 transfected parasites with pyrimethamine was performed as described previously(19).

481 For Microscopy work: confluent HeLa cells in 96well plate (40'000cells seeded the day  
482 before) were infected with ~20'000 PBANKA\_1003900<sup>GFP</sup> sporozoites. Cells were washed and  
483 detached 2hours post infection using accutase and seeded on glass covers in 24wells. At the  
484 indicated time points cells were fixed with 4%PFA in PBS for 10 min, washed with PBS and  
485 kept at 4°C. Nuclei were stained with 1microM Hoechst 33342 for 20 minutes, embedded

486 with Dako-mounting medium. Fluorescent microscopy pictures were taken on a Leica  
487 DM5500B. Signals were photographed using same exposure settings.

488 For live cell imaging, infected cells were seeded onto glass bottom dishes (35-20-1.5-N,  
489 Cellvis, Mountain View). Live cell microscopy was performed with a Leica DMI6000B  
490 epifluorescence microscope equipped with a SOLA-SE-II light source starting at 30hpi.

#### 491 **FACS sorting**

492 Cells kept in RNAlater were FACS sorted on a BD FACSARIA III, FACSflow was used as sheath  
493 fluid. A 561nm laser was used in combination of 610/20nm filter detect the infected cells. To  
494 obtain maximal purity we sorted using the 4-way-purity mode with 100 microns nozzle. The  
495 sorted cells were collected into RNAlater (500ul in Eppendorf tube). 100'000 non-infected  
496 cells at each time point were sorted as negative controls.

#### 497 **RNA isolation, Library preparation, Sequencing**

498 Prior to isolation of RNA by ReliaPrep™ RNA Cell Miniprep System RNAlater was removed  
499 from the cells by adding an equal volume of ddH<sub>2</sub>O to the cells. The cells were then  
500 centrifuged (200g, 2 minutes). The RNA from the pelleted cells was extracted according to  
501 the manufacturer's protocol and kept at -80°C. RNA extraction and Illumina m RNA-  
502 sequencing were performed in duplicates. Following RNA isolation, total RNA was quantified  
503 with a Qubit Fluorometer (Life Technologies). Quality of the extracted RNA was checked by  
504 the RNA integrity number (RIN), measured using an Agilent 2100 BioAnalyser (Agilent  
505 Technologies). The SMARTer™ Ultra Low RNA kit from Clontech was used for the reverse  
506 transcription and cDNA amplification according to manufacturer's specifications, starting  
507 with 10 ng of total RNA as input. The Nextera XT kit (Illumina, San Diego, CA, USA) was used  
508 for cDNA libraries preparation using 200 pg of cDNA. Poly A selection was applied to get rid  
509 of ribosomal RNA. Library molarity and quality was assessed with the Qubit and TapeStation  
510 using a DNA High sensitivity chip (Agilent Technologies). The cDNA libraries were pooled and  
511 loaded at 12.5 pM, multiplexed on the lanes of HiSeq Rapid PE v2 Flow cells for generating  
512 paired reads of 100 bases on an Illumina HiSeq 2500 sequencer (Illumina, San Diego, CA,  
513 USA).

#### 514 **Data processing**

515 Short reads generated in this study were deposited at the European Nucleotide Archive  
516 (<http://www.ebi.ac.uk/ena/>) are accessible through the accession number PRJEB23770  
517 (Secondary study accession number: ERP105548)." Publicly available data was obtained from  
518 SRA (SRP027529, ERS092084 and ERS092085). All reads were quality-checked with FastQC  
519 ([bioinformatics.babraham.ac.uk/projects/fastqc](http://bioinformatics.babraham.ac.uk/projects/fastqc)). For the publicly available data, illumina  
520 adaptor sequences and low-quality reads were removed with TrimGalore (version 0.4.1 with  
521 the parameter --illumina, [www.bioinformatics.babraham.ac.uk/projects/trim\\_galore](http://www.bioinformatics.babraham.ac.uk/projects/trim_galore)). For  
522 the data generated in this study, Nextera transposase sequences and low quality reads were  
523 removed with Trimmomatic (version 0.33 with the parameters  
524 ILLUMINACLIP:adapters/NexteraPE-PE.fa:2:30:10 LEADING:3 TRAILING:3  
525 SLIDINGWINDOW:5:30 MINLEN:50; (70). Low complexity reads were removed with fqtrim  
526 (version 0.9.4; (71). For paired-end reads, if only one end was removed, the remaining read  
527 end was treated as single-end read. To remove potential contamination with host RNA, all  
528 reads were aligned to the human genome (ensembl82) with Bowtie2 (version, 2.2.5; (72).  
529 Single-end reads and read pairs with none of the ends aligning to the human genome were

530 kept and aligned to the *P. berghei* ANKA reference genome (PlasmoDB Release 33) with  
531 Subread (i.e. subunc, version 1.4.6-p5; (73)) allowing up to 10 alignments per read (options: -  
532 n 20 -m 5 -B 10 -H -all Junctions, always in single-end mode, i.e., ignoring the reverse read-  
533 end of paired-end reads). Count tables were generated with Rcount (30) with an allocation  
534 distance of 100 bp for calculating the weights of the reads with multiple alignments and a  
535 minimal number of 5 hits. Count tables are available in supplemental **Table S2**.

### 536 **Differential expression**

537 Variation in gene expression was analyzed with a general linear model in R with the package  
538 DESeq2 (version 1.16.1; (74)) according to a design with a single factor comprising all  
539 different experimental groups. Specific groups were compared with linear contrasts and *P*-  
540 values were adjusted for multiple testing (75), (i.e., false discovery rate). Genes with an  
541 adjusted *P*-value (FDR) below 0.01 and a minimal logFC of 2 were considered to be  
542 differentially expressed. Normalized gene expression data for plotting and clustering was  
543 likewise obtained with DESeq2 (version 1.16.1; (74)).

### 544 **Gene co-expression network**

545 To identify groups of genes with similar expression patterns across the life cycle of *P.*  
546 *berghei*, we constructed a gene co-expression network (GCN). We therefore calculated an  
547 adjacency matrix with pairwise Pearson correlation coefficients, applied Fisher's *z*-  
548 transformation and tested each pairwise correlation coefficient for being significantly bigger  
549 than zero (as described in (37)). *P*-values were adjusted for multiple testing (75) and  
550 correlation coefficients with an adjusted *P*-value below 0.001 were identified as significant.  
551 The significant pairwise correlation coefficients were then used to construct the GCN. To  
552 resolve the community structure of the GCN, we used a modularity optimization algorithm  
553 (38) implemented by the function "cluster\_louvain" in the R package "igraph" (version 1.0.1;  
554 (76)) Communities with less than 11 genes were collapsed into a single "mixed" community  
555 (70 communities with a total of 197 genes). The network was visualized with Cytoscape  
556 (version 3.5.1, "prefuse force directed layout"; (77)) The GeneIDs per community are listed in  
557 **Table S4**.

### 558 **Gene ontology enrichment**

559 To functionally characterize the network communities or genes found to be differentially  
560 expressed, we tested for enrichment of gene ontology (GO) terms with topGO (version 3.4.1  
561 (78)) in conjunction with the GO annotation available from PlasmoDB (22). Analysis was  
562 based on gene counts (genes in the set of interest compared to all annotated genes) using  
563 the "weight" algorithm with Fisher's exact test (both implemented in topGO). A term was  
564 identified as significant if the *P*-value was below 0.05.

### 565 **Enrichment of selected gene groups**

566 To test for enrichment of a specific group of genes (e.g., "merozoite invasion genes" from  
567 (79)) within a gene set of interest compared to all genes annotated with any of the tested  
568 groups, we used Fisher's exact test (two-by-two contingency table). *P*-values were adjusted  
569 for multiple testing (75) and groups with an adjusted *P*-value (FDR) below 0.05 were  
570 identified as significant.

571

## 572 References

573

- 574 1. WHO | World Malaria Report 2016. WHO. 2017.
- 575 2. Douglas RG, Amino R, Sinnis P, Frischknecht F. Active migration and passive transport  
576 of malaria parasites. Trends Parasitol. Elsevier Current Trends; 2015 Aug 1;31(8):357–  
577 62.
- 578 3. Spielmann T, Montagna GN, Hecht L, Matuschewski K. Molecular make-up of the  
579 Plasmodium parasitophorous vacuolar membrane. Int J Med Microbiol. Elsevier  
580 GmbH.; 2012;302(4–5):179–86.
- 581 4. Kaiser G, De Niz M, Zuber B, Burda P-C, Kornmann B, Heussler VT, et al. High  
582 resolution microscopy reveals an unusual architecture of the Plasmodium berghei  
583 endoplasmic reticulum. Mol Microbiol. 2016 Aug 29;102(5):775–91.
- 584 5. Stanway RR, Mueller N, Zobiak B, Graewe S, Froehlke U, Zessin PJM, et al. Organelle  
585 segregation into Plasmodium liver stage merozoites. Cell Microbiol.  
586 2011;13(11):1768–82.
- 587 6. Burda PC, Schaffner M, Kaiser G, Roques M, Zuber B, Heussler VT. A Plasmodium  
588 plasma membrane reporter reveals membrane dynamics by live-cell microscopy. Sci  
589 Rep. 2017;7(1):1–14.
- 590 7. Burda P-C, Roelli MA, Schaffner M, Khan SM, Janse CJ, Heussler VT. A Plasmodium  
591 phospholipase is involved in disruption of the liver stage parasitophorous vacuole  
592 membrane. PLoS Pathog. 2015;11(3):e1004760.
- 593 8. Tawk L, Lacroix C, Gueirard P, Kent R, Gorgette O, Thiberge S, et al. A Key Role for  
594 Plasmodium Subtilisin-like SUB1 Protease in Egress of Malaria Parasites from Host  
595 Hepatocytes. J Biol Chem. 2013 Sep 5;288(46):33336–46.
- 596 9. Suarez C, Volkmann K, Gomes AR, Billker O, Blackman MJ. The malarial serine  
597 protease SUB1 plays an essential role in parasite liver stage development. PLoS  
598 Pathog. 2013;9(12):e1003811.
- 599 10. Deligianni E, Morgan RN, Bertuccini L, Wirth CC, Silmon de Monerri NC, Spanos L, et al.  
600 A perforin-like protein mediates disruption of the erythrocyte membrane during  
601 egress of *Plasmodium berghei* male gametocytes. Cell Microbiol. 2013  
602 Aug;15(8):1438–55.
- 603 11. Garg S, Agarwal S, Kumar S, Shams Yazdani S, Chitnis CE, Singh S. Calcium-dependent  
604 permeabilization of erythrocytes by a perforin-like protein during egress of malaria  
605 parasites. Nat Commun. 2013 Apr 16;4:1736.
- 606 12. Wirth CC, Glushakova S, Scheuermayer M, Repnik U, Garg S, Schaack D, et al. Perforin-  
607 like protein PPLP2 permeabilizes the red blood cell membrane during egress of *P*  
608 *lasmodium falciparum* gametocytes. Cell Microbiol. 2014 May;16(5):709–33.
- 609 13. Burda P-C, Caldelari R, Heussler VT. Manipulation of the Host Cell Membrane during  
610 *Plasmodium* Liver Stage Egress. MBio. 2017 Aug 29;8(2):e00139-17.



- 611 14. Sturm A, Amino R, van de Sand C, Regen T, Retzlaff S, Rennenberg A, et al.  
612 Manipulation of host hepatocytes by the malaria parasite for delivery into liver  
613 sinusoids. *Science*. 2006;313(5791):1287–90.
- 614 15. Graewe S, Stanway RR, Rennenberg A, Heussler VT. Chronicle of a death foretold:  
615 Plasmodium liver stage parasites decide on the fate of the host cell. *FEMS Microbiol*  
616 *Rev*. 2012;36(1):111–30.
- 617 16. Baer K, Klotz C, Kappe SHI, Schnieder T, Frevert U. Release of hepatic Plasmodium  
618 yoelii merozoites into the pulmonary microvasculature. *PLoS Pathog*.  
619 2007;3(11):e171.
- 620 17. Glushakova S, Yin D, Li T, Zimmerberg J. Membrane Transformation during Malaria  
621 Parasite Release from Human Red Blood Cells. *Curr Biol*. 2005;15:1645–50.
- 622 18. Ghosh AK, Jacobs-Lorena M. Plasmodium sporozoite invasion of the mosquito salivary  
623 gland. *Curr Opin Microbiol*. 2009 Aug;12(4):394–400.
- 624 19. Janse CJ, Ramesar J, Waters AP. High-efficiency transfection and drug selection of  
625 genetically transformed blood stages of the rodent malaria parasite Plasmodium  
626 berghei : Article : Nature Protocols. *Nat Protoc*. 2006 Sep 1;1(1):346–56.
- 627 20. Philip N, Orr R, Waters AP. Transfection of rodent malaria parasites. *Methods Mol*  
628 *Biol*. 2013;923:99–125.
- 629 21. Kaiser G, De Niz M, Burda P-C, Niklaus L, Stanway RL, Heussler V. Generation of  
630 transgenic rodent malaria parasites by transfection of cell culture-derived merozoites.  
631 *Malar J*. 2017 Aug 29;16.
- 632 22. Aurrecochea C, Brestelli J, Brunk BP, Dommer J, Fischer S, Gajria B, et al. PlasmoDB: a  
633 functional genomic database for malaria parasites. *Nucleic Acids Res*. Oxford  
634 University Press; 2009 Jan 1;37(Database):D539–43.
- 635 23. Poran A, Nötzel C, Aly O, Mencia-Trinchant N, Harris CT, Guzman ML, et al. Single-cell  
636 RNA sequencing reveals a signature of sexual commitment in malaria parasites.  
637 *Nature*. 2017;551(7678):95–9.
- 638 24. Reid AJ, Talman AM, Bennett HM, Gomes AR, Sanders MJ, Illingworth CJR, et al.  
639 Single-cell transcriptomics of malaria parasites. *bioRxiv*. Cold Spring Harbor  
640 Laboratory; 2017 Feb 10;105015.
- 641 25. Tarun AS, Peng X, Dumpit RF, Ogata Y, Silva-Rivera H, Camargo N, et al. A combined  
642 transcriptome and proteome survey of malaria parasite liver stages. *Proc Natl Acad*  
643 *Sci*. National Academy of Sciences; 2008 Nov 4;105(1):305–10.
- 644 26. Gural N, Mancio-Silva L, Miller AB, Galstian A, Butty VL, Levine SS, et al. In Vitro  
645 Culture, Drug Sensitivity, and Transcriptome of Plasmodium Vivax Hypnozoites. *Cell*  
646 *Host Microbe*. 2018 Mar 14;23(3):395–406.e4.
- 647 27. Nishimoto KP, Newkirk D, Hou S, Fruehauf J, Nelson EL. Fluorescence activated cell  
648 sorting (FACS) using RNAlater to minimize RNA degradation and perturbation of  
649 mRNA expression from cells involved in initial host microbe interactions. *J Microbiol*

- 650 Methods. 2007 Aug 29;70(1):205–8.
- 651 28. Zaitoun I, Erickson CS, Schell K, Epstein ML. Use of RNAlater in fluorescence-activated  
652 cell sorting (FACS) reduces the fluorescence from GFP but not from DsRed. BMC Res  
653 Notes. 2010 Aug 29;3:328.
- 654 29. Schmid MW, Schmidt A, Klostermeier UC, Barann M, Rosenstiel P, Grossniklaus U. A  
655 Powerful Method for Transcriptional Profiling of Specific Cell Types in Eukaryotes:  
656 Laser-Assisted Microdissection and RNA Sequencing. PLoS One. 2012 Nov  
657 4;7(1):e29685.
- 658 30. Schmid MW, Grossniklaus U. Rcount: Simple and flexible RNA-Seq read counting.  
659 Bioinformatics. 2015;31(3):436–7.
- 660 31. Otto TD, Böhme U, Jackson AP, Hunt M, Franke-Fayard B, Hoeijmakers WAM, et al. A  
661 comprehensive evaluation of rodent malaria parasite genomes and gene expression.  
662 BMC Biol. 2014 Dec 30;12(1):86.
- 663 32. Lasonder E, Rijpma SR, van Schaijk BCL, Hoeijmakers WAMAM, Kensche PR, Gresnigt  
664 MS, et al. Integrated transcriptomic and proteomic analyses of *P. falciparum*  
665 gametocytes: molecular insight into sex-specific processes and translational  
666 repression. Nucleic Acids Res. Oxford University Press; 2016 Jul 27;44(13):6087–101.
- 667 33. Mair GR, Braks JAM, Garver LS, Dimopoulos G, Hall N, Wiegant JCAG, et al.  
668 Translational Repression is essential for Plasmodium sexual development and  
669 mediated by a DDX6-type RNA helicase. Science. 2006 Sep 1;313(5787):667–9.
- 670 34. Mair GR, Lasonder E, Garver LS, Franke-Fayard BMD, Carret CK, Wiegant JCAG, et al.  
671 Universal Features of Post-Transcriptional Gene Regulation Are Critical for  
672 Plasmodium Zygote Development. Deitsch K, editor. PLoS Pathog. 2010 Feb  
673 12;6(2):e1000767.
- 674 35. Franke-Fayard B, Trueman H, Ramesar J, Mendoza J, van der Keur M, van der Linden  
675 R, et al. A Plasmodium berghei reference line that constitutively expresses GFP at a  
676 high level throughout the complete life cycle. Mol Biochem Parasitol. Elsevier; 2004  
677 Sep 1;137(1):23–33.
- 678 36. Hliscs M, Nahar C, Frischknecht F, Matuschewski K. Expression Profiling of  
679 Plasmodium berghei HSP70 Genes for Generation of Bright Red Fluorescent Parasites.  
680 Spielmann T, editor. PLoS One. 2013 Aug 27;8(8):e72771.
- 681 37. Coman D, Rütimann P, Gruissem W. A Flexible Protocol for Targeted Gene Co-  
682 expression Network Analysis. In: Plant Isoprenoids. Humana Press, New York, NY;  
683 2014. p. 285–99. (Methods in Molecular Biology).
- 684 38. Blondel VD, Guillaume J-L, Lambiotte R, Lefebvre E. Fast unfolding of communities in  
685 large networks. J Stat Mech Theory Exp. 2008 Nov 3;2008(10):P10008.
- 686 39. Saeed S, Carter V, Tremp AZ, Dessens JT. Translational repression controls temporal  
687 expression of the Plasmodium berghei LCCL protein complex. Mol Biochem Parasitol.  
688 2013 May;189(1–2):38–42.

- 689 40. Rao PN, Santos JM, Pain A, Templeton TJ, Mair GR. Translational repression of the  
690 cpw-wpc gene family in the malaria parasite *Plasmodium*. *Parasitol Int*. 2016  
691 Oct;65(5):463–71.
- 692 41. Zhang M, Fennell C, Ranford-Cartwright L, Sakthivel R, Gueirard P, Meister S, et al. The  
693 *Plasmodium* eukaryotic initiation factor-2 $\alpha$  kinase IK2 controls the latency of  
694 sporozoites in the mosquito salivary glands. *J Exp Med*. The Rockefeller University  
695 Press; 2010 Jul 5;207(7):1465–74.
- 696 42. Silvie O, Briquet S, Müller K, Manzoni G, Matuschewski K. Post-transcriptional  
697 silencing of *UIS4* in *P. falciparum* sporozoites is important for host switch. *Mol*  
698 *Microbiol*. 2014 Mar;91(6):1200–13.
- 699 43. Zhang M, Joyce BR, Sullivan WJ, Nussenzweig V, Nussenzweig V. Translational control  
700 in *Plasmodium* and *Toxoplasma* parasites. *Eukaryot Cell*. American Society for  
701 Microbiology (ASM); 2013 Feb;12(2):161–7.
- 702 44. Kiss T. Small nucleolar RNAs: an abundant group of noncoding RNAs with diverse  
703 cellular functions. *Cell*. Elsevier; 2002 Apr 19;109(2):145–8.
- 704 45. Fougère A, Jackson AP, Paraskevi Bechtsi D, Braks JAM, Annoura T, Fonager J, et al.  
705 Variant Exported Blood-Stage Proteins Encoded by *Plasmodium* Multigene Families  
706 Are Expressed in Liver Stages Where They Are Exported into the Parasitophorous  
707 Vacuole. *PLoS Pathog*. 2016;12(11):1–37.
- 708 46. Tarun AS, Vaughan AM, Kappe SHI. Redefining the role of de novo fatty acid synthesis  
709 in *Plasmodium* parasites. *Trends Parasitol*. Elsevier Current Trends; 2009 Dec  
710 1;25(12):545–50.
- 711 47. Yu M, Kumar TRS, Nkrumah LJ, Coppi A, Retzlaff S, Li CD, et al. The fatty acid  
712 biosynthesis enzyme *FabI* plays a key role in the development of liver-stage malarial  
713 parasites. *Cell Host Microbe*. NIH Public Access; 2008 Dec 11;4(6):567–78.
- 714 48. Vaughan AM, O'Neill MT, Tarun AS, Camargo N, Phuong TM, Aly ASI, et al. Type II fatty  
715 acid synthesis is essential only for malaria parasite late liver stage development. *Cell*  
716 *Microbiol*. Wiley-Blackwell; 2009 Mar;11(3):506–20.
- 717 49. Shears MJ, Botté CY, McFadden GI. Fatty acid metabolism in the *Plasmodium*  
718 apicoplast: Drugs, doubts and knockouts. *Mol Biochem Parasitol*. Elsevier; 2015 Jan  
719 1;199(1–2):34–50.
- 720 50. Niz M De, Ullrich A-K, Heiber A, Soares AB, Pick C, Lyck R, et al. The machinery  
721 underlying malaria parasite virulence is conserved between rodent and human  
722 malaria parasites. *Nat Commun*. 2016 Nov 4;7:ncomms11659.
- 723 51. Fonager J, Pasini EM, Braks JAM, Klop O, Ramesar J, Remarque EJ, et al. Reduced  
724 CD36-dependent tissue sequestration of *Plasmodium*-infected erythrocytes is  
725 detrimental to malaria parasite growth in vivo. *J Exp Med*. The Rockefeller University  
726 Press; 2012 Jan 16;209(1):93–107.
- 727 52. Pasini EM, Braks JA, Fonager J, Klop O, Aime E, Spaccapelo R, et al. Proteomic and  
728 Genetic Analyses Demonstrate that *Plasmodium berghei* Blood Stages Export a Large

- 729 and Diverse Repertoire of Proteins. Mol Cell Proteomics. 2013 Feb;12(2):426–48.
- 730 53. Hiigel' F-U, Prade12 G, Frevert U. Release of malaria circumsporozoite protein into the  
731 host cell cytoplasm and interaction with ribosomes. Vol. 8, Molecular and Biochemical  
732 Parasitology. 1996.
- 733 54. Beaudoin RL, Leef JL, Leland P, Leef MF, Hollingdale MR. Serological Reactivity of in  
734 Vitro Cultured Exoerythrocytic Stages of Plasmodium Berghei in Indirect  
735 Immunofluorescent or Immunoperoxidase Antibody Tests. Am J Trop Med Hyg. The  
736 American Society of Tropical Medicine and Hygiene; 1983 Jan 1;32(1):24–30.
- 737 55. Orito Y, Ishino T, Iwanaga S, Kaneko I, Kato T, Menard R, et al. Liver-specific protein 2:  
738 a Plasmodium protein exported to the hepatocyte cytoplasm and required for  
739 merozoite formation. Mol Microbiol. 2013 Jan;87(1):66–79.
- 740 56. Kumar K, Singal A, Rizvi MMA, Chauhan VS. High mobility group box (HMGB) proteins  
741 of Plasmodium falciparum: DNA binding proteins with pro-inflammatory activity.  
742 Parasitol Int. Elsevier; 2008 Jun 1;57(2):150–7.
- 743 57. Cunningham D, Lawton J, Jarra W, Preiser P, Langhorne J. The pir multigene family of  
744 Plasmodium: Antigenic variation and beyond. Mol Biochem Parasitol. 2010  
745 Apr;170(2):65–73.
- 746 58. Li X, Chen H, Oo TH, Daly TM, Bergman LW, Liu S-C, et al. A Co-ligand Complex  
747 Anchors Plasmodium falciparum Merozoites to the Erythrocyte Invasion Receptor  
748 Band 3. J Biol Chem. 2004 Nov 4;279(7):5765–71.
- 749 59. Kariuki MM, Li X, Yamodo I, Chishti AH, Oh SS. Two Plasmodium falciparum merozoite  
750 proteins binding to erythrocyte band 3 form a direct complex. Biochem Biophys Res  
751 Commun. 2005 Nov 4;338(4):1690–5.
- 752 60. Bushell E, Gomes AR, Sanderson T, Anar B, Girling G, Herd C, et al. Functional Profiling  
753 of a Plasmodium Genome Reveals an Abundance of Essential Genes. Cell. Elsevier;  
754 2017;170(2):260–272.e8.
- 755 61. Siau A, Huang X, Weng M, Sze SK, Preiser PR. Proteome mapping of *Plasmodium*:  
756 identification of the *P. yoelii* remodelome. Sci Rep. 2016 Nov 4;6:srep31055.
- 757 62. Cui L, Lindner S, Miao J. Translational regulation during stage transitions in malaria  
758 parasites. Ann N Y Acad Sci. John Wiley & Sons, Ltd (10.1111); 2015 Apr 1;1342(1):1–9.
- 759 63. Martin-Jaular L, Ferrer M, Calvo M, Rosanas-Urgell A, Kalko S, Graewe S, et al. Strain-  
760 specific spleen remodelling in Plasmodium yoelii infections in Balb/c mice facilitates  
761 adherence and spleen macrophage-clearance escape. Cell Microbiol. Wiley-Blackwell;  
762 2011 Jan;13(1):109–22.
- 763 64. del Portillo HA, Ferrer M, Brugat T, Martin-Jaular L, Langhorne J, Lacerda MVG. The  
764 role of the spleen in malaria. Cell Microbiol. Blackwell Publishing Ltd; 2012 Mar  
765 1;14(3):343–55.
- 766 65. De Niz M, Helm S, Horstmann S, Annoura T, Del Portillo HA, Khan SM, et al. In vivo and  
767 in vitro characterization of a Plasmodium liver stage-specific promoter. PLoS One.

- 768 2015;10(4):e0123473.
- 769 66. Ishino T, Boisson B, Orito Y, Lacroix C, Bischoff E, Loussert C, et al. LISP1 is important  
770 for the egress of *Plasmodium berghei* parasites from liver cells. *Cell Microbiol.* Wiley-  
771 Blackwell; 2009 Sep;11(9):1329–39.
- 772 67. Helm S, Lehmann C, Nagel A, Stanway RR, Horstmann S, Llinas M, et al. Identification  
773 and characterization of a liver stage-specific promoter region of the malaria parasite  
774 *Plasmodium*. *PLoS One.* 2010;5(10):e13653.
- 775 68. Dechering KJ, Thompson J, Dodemont HJ, Eling W, Konings RN. Developmentally  
776 regulated expression of *pfs16*, a marker for sexual differentiation of the human  
777 malaria parasite *Plasmodium falciparum*. *Mol Biochem Parasitol.* 1997 Nov;89(2):235–  
778 44.
- 779 69. Deligianni E, Andreadaki M, Koutsouris K, Siden-Kiamos I. Sequence and functional  
780 divergence of gametocyte-specific parasitophorous vacuole membrane proteins in  
781 *Plasmodium* parasites. *Mol Biochem Parasitol.* Elsevier; 2018 Mar 1;220:15–8.
- 782 70. Bolger AM, Lohse M, Usadel B. Trimmomatic: a flexible trimmer for Illumina sequence  
783 data. *Bioinformatics.* 2014 Aug;30(15):2114–20.
- 784 71. Perteua G. fqtrim: v0.9.4 release. Zenodo; 2015 Nov.
- 785 72. Langmead B, Salzberg SL. Fast gapped-read alignment with Bowtie 2. *Nat Methods.*  
786 2012 Nov 3;9(4):357–9.
- 787 73. Liao Y, Smyth GK, Shi W. The Subread aligner: fast, accurate and scalable read  
788 mapping by seed-and-vote. *Nucleic Acids Res.* 2013 Nov 3;41(10):e108–e108.
- 789 74. Love MI, Huber W, Anders S. Moderated estimation of fold change and dispersion for  
790 RNA-seq data with DESeq2. *Genome Biol.* 2014 Nov 3;15:550.
- 791 75. Benjamini Y, Hochberg Y. Controlling the False Discovery Rate: A Practical and  
792 Powerful Approach to Multiple Testing. *J R Stat Soc Ser B.* 1995 Nov 4;57(1):289–300.
- 793 76. Csardi G, Nepusz T. The Igraph Software Package for Complex Network Research.  
794 *InterJournal.* 2005;Complex Sy:1695.
- 795 77. Shannon P, Markiel A, Ozier O, Baliga NS, Wang JT, Ramage D, et al. Cytoscape: A  
796 Software Environment for Integrated Models of Biomolecular Interaction Networks.  
797 *Genome Res.* 2003 Nov 4;13(11):2498–504.
- 798 78. Alexa A, Rahnenführer J, Lengauer T. Improved scoring of functional groups from gene  
799 expression data by decorrelating GO graph structure. *Bioinformatics.*  
800 2006;22(13):1600–7.
- 801 79. Bozdech Z, Llinás M, Pulliam BL, Wong ED, Zhu J, DeRisi JL. The Transcriptome of the  
802 Intraerythrocytic Developmental Cycle of *Plasmodium falciparum*. *PLOS Biol.* 2003 Sep  
803 1;1(1):e5.
- 804 80. Yeoh LM, Goodman CD, Mollard V, McFadden GI, Ralph SA. Comparative  
805 transcriptomics of female and male gametocytes in *Plasmodium berghei* and the

- 806 evolution of sex in alveolates. *BMC Genomics*. 2017 Dec 18;18(1):734.
- 807 81. Spence PJ, Jarra W, Lévy P, Reid AJ, Chappell L, Brugat T, et al. Vector transmission  
808 regulates immune control of *Plasmodium* virulence. *Nature*. Europe PMC Funders;  
809 2013 Jun 13;498(7453):228–31.
- 810 82. Lindner SE, Mikolajczak SA, Vaughan AM, Moon W, Joyce BR, Sullivan WJ, et al.  
811 Perturbations of *Plasmodium* Puf2 Expression and RNA-seq of Puf2-Deficient  
812 Sporozoites Reveal a Critical Role in Maintaining RNA Homeostasis and Parasite  
813 Transmissibility. *Cell Microbiol*. NIH Public Access; 2013 Sep 1;15(7).
- 814 83. Vignali M, Armour CD, Chen J, Morrison R, Castle JC, Biery MC, et al. NSR-seq  
815 transcriptional profiling enables identification of a gene signature of *Plasmodium*  
816 *falciparum* parasites infecting children. *J Clin Invest*. American Society for Clinical  
817 Investigation; 2011 Mar;121(3):1119–29.
- 818 84. Bunnik EM, Chung D-WD, Hamilton M, Ponts N, Saraf A, Prudhomme J, et al. Polysome  
819 profiling reveals translational control of gene expression in the human malaria  
820 parasite *Plasmodium falciparum*. *Genome Biol*. BioMed Central; 2013 Sep  
821 1;14(11):R128.
- 822 85. Otto TD, Wilinski D, Assefa S, Keane TM, Sarry LR, Böhme U, et al. New insights into  
823 the blood-stage transcriptome of *Plasmodium falciparum* using RNA-Seq. *Mol*  
824 *Microbiol*. Wiley-Blackwell; 2010 Sep 1;76(1):12–24.
- 825 86. López-Barragán MJ, Lemieux J, Quiñones M, Williamson KC, Molina-Cruz A, Cui K, et  
826 al. Directional gene expression and antisense transcripts in sexual and asexual stages  
827 of *Plasmodium falciparum*. *BMC Genomics*. BioMed Central; 2011 Sep 1;12(1):587.
- 828 87. Bártfai R, Hoeijmakers WAMM, Salcedo-Amaya AM, Smits AH, Janssen-Megens E,  
829 Kaan A, et al. H2A.Z demarcates intergenic regions of the *Plasmodium falciparum*  
830 epigenome that are dynamically marked by H3K9ac and H3K4me3. *PLoS Pathog*.  
831 Public Library of Science; 2010 Dec 16;6(12):e1001223.
- 832 88. Zanghì G, Vembar SS, Baumgarten S, Ding S, Guizetti J, Bryant JM, et al. A Specific  
833 PfEMP1 Is Expressed in *P. falciparum* Sporozoites and Plays a Role in Hepatocyte  
834 Infection. *Cell Rep*. 2018 Mar 13;22(11):2951–63.
- 835 89. Zhu L, Mok S, Imwong M, Jaidee A, Russell B, Nosten F, et al. New insights into the  
836 *Plasmodium vivax* transcriptome using RNA-Seq. *Sci Rep*. Nature Publishing Group;  
837 2016 Sep 9;6(1):20498.
- 838 90. Joyner C, Moreno A, Meyer EVS, Cabrera-Mora M, Kissinger JC, Barnwell JW, et al.  
839 *Plasmodium cynomolgi* infections in rhesus macaques display clinical and  
840 parasitological features pertinent to modelling *vivax* malaria pathology and relapse  
841 infections. *Malar J*. 2016 Dec 2;15(1):451.
- 842 91. Hall N, Karras M, Raine JD, Carlton JM, Kooij TWA, Berriman M, et al. A comprehensive  
843 survey of the *Plasmodium* life cycle by genomic, transcriptomic, and proteomic  
844 analyses. *Science*. American Association for the Advancement of Science; 2005 Jan  
845 7;307(5706):82–6.

- 846 92. Yuda M, Iwanaga S, Kaneko I, Kato T. Global transcriptional repression: An initial and  
847 essential step for *Plasmodium* sexual development. Proc Natl Acad Sci. 2015 Oct  
848 13;112(41):12824–9.
- 849 93. Zhou Y, Ramachandran V, Kumar KA, Westenberger S, Refour P, Zhou B, et al.  
850 Evidence-Based Annotation of the Malaria Parasite’s Genome Using Comparative  
851 Expression Profiling. Hofmann O, editor. PLoS One. 2008 Feb 13;3(2):e1570.
- 852 94. Stubbs J, Simpson KM, Triglia T, Plouffe D, Tonkin CJ, Duraisingh MT, et al. Molecular  
853 Mechanism for Switching of *P. falciparum* Invasion Pathways into Human  
854 Erythrocytes. Science (80- ). 2005 Aug 26;309(5739):1384–7.
- 855 95. Jiang H, Patel JJ, Yi M, Mu J, Ding J, Stephens R, et al. Genome-wide compensatory  
856 changes accompany drug- selected mutations in the *Plasmodium falciparum* crt gene.  
857 Kazura J, editor. PLoS One. 2008 Jun 25;3(6):e2484.
- 858 96. Le Roch KG, Zhou Y, Blair PL, Grainger M, Moch JK, Haynes JD, et al. Discovery of Gene  
859 Function by Expression Profiling of the Malaria Parasite Life Cycle. Science (80- ). 2003  
860 Sep 12;301(5639):1503–8.
- 861 97. Pelle KG, Oh K, Buchholz K, Narasimhan V, Joice R, Milner DA, et al. Transcriptional  
862 profiling defines dynamics of parasite tissue sequestration during malaria infection.  
863 Genome Med. BioMed Central; 2015 Sep 1;7(1):19.
- 864 98. Young JA, Fivelman QL, Blair PL, de la Vega P, Le Roch KG, Zhou Y, et al. The  
865 *Plasmodium falciparum* sexual development transcriptome: A microarray analysis  
866 using ontology-based pattern identification. Mol Biochem Parasitol. 2005 Sep  
867 1;143(1):67–79.
- 868 99. Tonkin CJ, Carret CK, Duraisingh MT, Voss TS, Ralph SA, Hommel M, et al. Sir2  
869 Paralogues Cooperate to Regulate Virulence Genes and Antigenic Variation in  
870 *Plasmodium falciparum*. PLoS Biol. Public Library of Science; 2009 Sep 1;7(4):e84.
- 871 100. Rovira-Graells N, Gupta AP, Planet E, Crowley VM, Mok S, Ribas de Pouplana L, et al.  
872 Transcriptional variation in the malaria parasite *Plasmodium falciparum*. Genome Res.  
873 2012 May 1;22(5):925–38.
- 874 101. Bozdech Z, Llinás M, Pulliam BL, Wong ED, Zhu J, DeRisi JL. The Transcriptome of the  
875 Intraerythrocytic Developmental Cycle of *Plasmodium falciparum*. PLOS Biol. Public  
876 Library of Science; 2003 Sep 1;1(1):85–100.
- 877 102. Llinás M, Bozdech Z, Wong ED, Adai AT, DeRisi JL. Comparative whole genome  
878 transcriptome analysis of three *Plasmodium falciparum* strains. Nucleic Acids Res.  
879 Oxford University Press; 2006 Sep 1;34(4):1166–73.
- 880 103. Lemieux JE, Gomez-Escobar N, Feller A, Carret C, Amambua-Ngwa A, Pinches R, et al.  
881 Statistical estimation of cell-cycle progression and lineage commitment in  
882 *Plasmodium falciparum* reveals a homogeneous pattern of transcription in ex vivo  
883 culture. Proc Natl Acad Sci U S A. National Academy of Sciences; 2009 May  
884 5;106(18):7559–64.
- 885 104. Shock JL, Fischer KF, DeRisi JL. Whole-genome analysis of mRNA decay in *Plasmodium*

- 886            falciparum reveals a global lengthening of mRNA half-life during the intra-erythrocytic  
887            development cycle. *Genome Biol.* 2007;8(7):R134.
- 888    105.    Bozdech Z, Mok S, Hu G, Imwong M, Jaidee A, Russell B, et al. The transcriptome of  
889            *Plasmodium vivax* reveals divergence and diversity of transcriptional regulation in  
890            malaria parasites. *Proc Natl Acad Sci U S A. National Academy of Sciences*; 2008 Sep  
891            1;105(42):16290–5.
- 892    106.    Westenberger SJ, McClean CM, Chattopadhyay R, Dharia N V., Carlton JM, Barnwell  
893            JW, et al. A Systems-Based Analysis of *Plasmodium vivax* Lifecycle Transcription from  
894            Human to Mosquito. Dinglasan RR, editor. *PLoS Negl Trop Dis.* 2010 Apr 6;4(4):e653.
- 895    107.    Lapp SA, Mok S, Zhu L, Wu H, Preiser PR, Bozdech Z, et al. *Plasmodium knowlesi* gene  
896            expression differs in ex vivo compared to in vitro blood-stage cultures. *Malar J.*  
897            *BioMed Central*; 2015 Mar 13;14(1):110.
- 898    108.    Warnes GR, Bolker B, Bonebakker L, Gentleman R, Liaw WHA, Lumley T, et al. *gplots:*  
899            *Various R Programming Tools for Plotting Data.* 3.0.1. 2016.
- 900
- 901



902 **Figures and Tables**

**RNA-seq**

| <b>Plasmodium species</b>    | <b>Life cycle stages</b>                                                                                          | <b>reference</b>                   |
|------------------------------|-------------------------------------------------------------------------------------------------------------------|------------------------------------|
| <i>P. berghei</i> ANKA       | 5 asexual and sexual stage transcriptomes                                                                         | (31)                               |
| <i>P. berghei</i> ANKA       | Female and male gametocyte                                                                                        | (80)                               |
| <i>P. chabaudi chabaudi</i>  | Trophozoite transcriptomes after mosquito transmission or direct injection into mice                              | (81)                               |
| <i>P. yoelii yoelii</i> 17X  | Salivary gland sporozoite transcriptomes: WT vs. Puf2-KO                                                          | (82)                               |
| <i>P. falciparum</i> 3D7     | NSR-seq Transcript Profiling of malaria-infected pregnant women and children                                      | (83)                               |
| <i>P. falciparum</i> 3D7     | Polysomal and steady- <i>P. berghei</i> state asexual stage transcriptomes                                        | (84)                               |
| <i>P. falciparum</i> 3D7     | Blood stage transcriptome (3D7)                                                                                   | (85)                               |
| <i>P. falciparum</i> 3D7     | Transcriptomes of 7 sexual and asexual life stages                                                                | (86)                               |
| <i>P. falciparum</i> 3D7     | Intraerythrocytic cycle transcriptome (3D7)                                                                       | (Hoeijmakers et al.) NOT published |
| <i>P. falciparum</i> 3D7     | Strand specific transcriptomes of 4 life cycle stages                                                             | (86)                               |
| <i>P. falciparum</i> 3D7     | Transcriptome during intraerythrocytic development                                                                | (87)                               |
| <i>P. falciparum</i> 3D7     | Mosquito or cultured sporozoites and blood stage transcriptome (NF54)                                             | (Hoffmann et al.) NOT published    |
| <i>P. falciparum</i> 3D7     | Female and Male Gametocyte Transcriptomes                                                                         | (32)                               |
| <i>P. falciparum</i> 3D7     | Ring, Oocyst and Sporozoite Transcriptomes                                                                        | (88)                               |
| <i>P. vivax</i> P01          | Hypnozoite RNAseq                                                                                                 | (26)                               |
| <i>P. vivax</i> P01          | Transcription profile of intraerythrocytic cycle                                                                  | (89)                               |
| <i>P. cynomolgi</i> strain M | <i>P. cynomolgi</i> transcriptome of whole blood and bone marrow collected during 100-day infection of M. mulatta | (90)                               |

**Array**

| <b>Plasmodium species</b>   | <b>Life cycle stages</b>                                              | <b>reference</b>              |
|-----------------------------|-----------------------------------------------------------------------|-------------------------------|
| <i>P. berghei</i> ANKA      | DOZI Mutant Transcript Profile                                        | (33)                          |
| <i>P. berghei</i> ANKA      | Transcript Profiling of Developmental Stages - High Producer (HP/HPE) | (91)                          |
| <i>P. berghei</i> ANKA      | AP2-G2 knock out and WT expression profiles                           | (92)                          |
| <i>P. yoelii yoelii</i> 17X | Liver, mosquito and blood stage expression profiles                   | (25)                          |
| <i>P. yoelii yoelii</i> 17X | Life Cycle Stages                                                     | (93)                          |
| <i>P. falciparum</i> 3D7    | Pfal3D7 real-time transcription and decay                             | (Manuel Llinas) NOT published |
| <i>P. falciparum</i> 3D7    | Invasion pathway knockouts                                            | (94)                          |
| <i>P. falciparum</i> 3D7    | Three Isogenic Lines w/ CQ Treatment: expression profiles             | (95)                          |
| <i>P. falciparum</i> 3D7    | Life cycle expression data (3D7)                                      | (96)                          |
| <i>P. falciparum</i> 3D7    | Sexually vs asexually committed schizont transcriptional profiles     | (97)                          |
| <i>P. falciparum</i> 3D7    | Gametocyte stages I-V transcriptomes                                  | (98)                          |
| <i>P. falciparum</i> 3D7    | Two Sir2 KO lines expression profiling                                | (99)                          |
| <i>P. falciparum</i> 3D7    | Asexual blood stage transcriptomes of clonal strains                  | (100)                         |
| <i>P. falciparum</i> 3D7    | Erythrocytic expression time series (3D7, DD2, HB3)                   | (101,102)                     |
| <i>P. falciparum</i> 3D7    | Microarray Expression from Patient Samples                            | (103)                         |

|                             |                                                                                 |       |
|-----------------------------|---------------------------------------------------------------------------------|-------|
| <i>P. falciparum</i> 3D7    | mRNA Half life                                                                  | (104) |
| <i>P. vivax</i> P01         | Intraerythrocytic developmental cycle of three isolates                         | (105) |
| <i>P. vivax</i> P01         | Sporozoite Expression Profiles                                                  | (106) |
| <i>P. knowlesi</i> strain H | Intraerythrocytic cycle expression profile: in vitro and ex vivo (Pkno PK1(A+)) | (107) |

**Single cell / DropSeq**

| <b><i>Plasmodium</i> species</b>             | <b>Life cycle stages</b>                                                            | <b>reference</b> |
|----------------------------------------------|-------------------------------------------------------------------------------------|------------------|
| <i>P. falciparum</i> 3D7                     | DropSeq of single <i>P. falciparum</i> infected erythrocytes                        | (23)             |
| <i>P. falciparum</i> 3D7 / <i>P. berghei</i> | Single cell RNA from <i>P. berghei</i> & <i>P. falciparum</i> infected erythrocytes | (24)             |

903

904 **Table 1:** Genome wide transcriptome data from studies implemented in PlasmoDB  
905 (release40; [www.plasmodb.org](http://www.plasmodb.org)). RNA-seq analyses, micro-array analyses and  
906 Single/DropSeq analyses are shown

**i) Preferentially expressed in exo-erythrocytic stage**

| Biological Process ID | Process Description               | Annotated | Observed | pValue |
|-----------------------|-----------------------------------|-----------|----------|--------|
| GO:0006633            | fatty acid biosynthetic process   | 9         | 6        | 4e-06  |
| GO:0044409            | entry into host                   | 33        | 7        | 0.0036 |
| GO:0006272            | leading strand elongation         | 2         | 2        | 0.0040 |
| GO:0033014            | tetrapyrrole biosynthetic process | 9         | 4        | 0.0042 |
| GO:0006260            | DNA replication                   | 39        | 10       | 0.0110 |
| GO:0055114            | oxidation-reduction process       | 83        | 12       | 0.0215 |
| GO:0006270            | DNA replication initiation        | 4         | 2        | 0.0219 |
| GO:0006334            | nucleosome assembly               | 4         | 2        | 0.0219 |

**ii) Preferentially expressed in erythrocytic stage**

| Biological Process ID | Process Description                                                                                       | Annotated | Observed | pValue  |
|-----------------------|-----------------------------------------------------------------------------------------------------------|-----------|----------|---------|
| GO:0006928            | movement of cell or subcellular component                                                                 | 34        | 6        | 0.00036 |
|                       | translocation of peptides or proteins into host cell                                                      | 3         | 2        |         |
| GO:0044053            | cytoplasm                                                                                                 |           |          | 0.00256 |
| GO:0040011            | locomotion                                                                                                | 22        | 5        | 0.00644 |
| GO:0035891            | exit from host cell                                                                                       | 8         | 2        | 0.02169 |
| GO:0009405            | pathogenesis                                                                                              | 8         | 2        | 0.02169 |
| GO:0030833            | regulation of actin filament polymerization                                                               | 1         | 1        | 0.02978 |
| GO:0006166            | purine ribonucleoside salvage                                                                             | 1         | 1        | 0.02978 |
| GO:0019510            | S-adenosylhomocysteine catabolic process                                                                  | 1         | 1        | 0.02978 |
|                       | negative regulation of isopentenyl diphosphate biosynthetic process, methylerythritol 4-phosphate pathway | 1         | 1        |         |
| GO:0010323            |                                                                                                           |           |          | 0.02978 |
|                       | cytoadherence to microvasculature, mediated by symbiont protein                                           | 1         | 1        |         |
| GO:0020035            |                                                                                                           |           |          | 0.02978 |
| GO:0007050            | cell cycle arrest                                                                                         | 1         | 1        | 0.02978 |

907

908 **Table 2:** Gene ontology (GO) term annotation of genes preferentially expressed in i) EEf  
 909 stages (24h, 48h, 54h and 60h) and ii) asexual EF stages (ring 4h, trophozoite 16h). The  
 910 number of annotated genes (number genes per GO term present in the entire RNA-seq  
 911 study) and observed genes (number of genes per GO term preferentially expressed in...) per  
 912 Biological Process are listed. Only GO terms with p-values < 0.05 are shown.

**i) Preferentially expressed in exo-erythrocytic stage merozoites**

| Biological Process ID | Process Description                                               | Annotated | Observed | pValue  |
|-----------------------|-------------------------------------------------------------------|-----------|----------|---------|
| GO:0010467            | gene expression                                                   | 462       | 181      | 3.0e-22 |
| GO:0042254            | ribosome biogenesis                                               | 63        | 47       | 4.6e-20 |
| GO:0043604            | amide biosynthetic process                                        | 219       | 98       | 1.1e-17 |
| GO:0032774            | RNA biosynthetic process                                          | 103       | 35       | 0.00017 |
| GO:0017183            | peptidyl-diphthamide biosynthetic process from peptidyl-histidine | 5         | 4        | 0.00700 |
| GO:0000398            | mRNA splicing, via spliceosome                                    | 43        | 15       | 0.01718 |
| GO:0008295            | spermidine biosynthetic process                                   | 2         | 2        | 0.04105 |
| GO:0008612            | peptidyl-lysine modification to peptidyl-hypusine                 | 2         | 2        | 0.04105 |

**ii) Preferentially expressed in erythrocytic stage merozoites**

| Biological Process ID | Process Description                           | Annotated | Observed | pValue |
|-----------------------|-----------------------------------------------|-----------|----------|--------|
| GO:0007264            | small GTPase mediated signal transduction     | 26        | 14       | 0.0014 |
| GO:0006260            | DNA replication                               | 39        | 20       | 0.0049 |
| GO:0045184            | establishment of protein localization         | 93        | 34       | 0.0060 |
| GO:0007017            | microtubule-based process                     | 35        | 15       | 0.0075 |
| GO:0000041            | transition metal ion transport                | 7         | 6        | 0.0151 |
| GO:0006465            | signal peptide processing                     | 5         | 4        | 0.0153 |
| GO:0006848            | pyruvate transport                            | 3         | 3        | 0.0154 |
| GO:0006497            | protein lipidation                            | 21        | 10       | 0.0196 |
| GO:0006511            | ubiquitin-dependent protein catabolic process | 38        | 16       | 0.0248 |
| GO:0043248            | proteasome assembly                           | 8         | 5        | 0.0267 |
| GO:0006310            | DNA recombination                             | 9         | 6        | 0.0366 |
| GO:0006468            | protein phosphorylation                       | 82        | 28       | 0.0437 |

913 **Table 3:** Gene ontology (GO) term annotation of genes preferentially expressed in i) EEf  
914 merozoites (DC) and ii) EF merozoites (22h schizonts). The number of annotated genes  
915 (number genes per GO term present in the entire RNA-seq study) and observed genes  
916 (number of genes per GO term preferentially expressed in...) per Biological Process are  
917 listed. Only GO terms with p-values < 0.05 are shown.

|                                                         |                | 48h-DC compared to other stages |           |          |
|---------------------------------------------------------|----------------|---------------------------------|-----------|----------|
|                                                         |                | mean LogFC                      | Min adjP  | Max adjP |
| liver specific protein 2 ( <i>lisp2</i> )               | PBANKA_1003000 | 9.946                           | 2.26E-228 | 1.22E-18 |
| “gametocyte-specific protein” ( <i>lisp3</i> )          | PBANKA_1003900 | 8.730                           | 9.44E-133 | 2.17E-10 |
| conserved Plasmodium membrane protein, unknown function | PBANKA_0518900 | 8.697                           | 3.36E-175 | 9.55E-17 |
| liver specific protein 1 ( <i>lisp1</i> )               | PBANKA_1024600 | 8.475                           | 1.21E-189 | 1.24E-38 |
| conserved Plasmodium protein, unknown function          | PBANKA_0519500 | 7.035                           | 7.81E-64  | 2.28E-21 |

918

919 **Table 4:** LogFC and FDR (adjP) values of EEF-specific genes (EEF\_48h - DC compared to other  
920 stages). LogFC is indicated as mean of EEF late stages by single comparisons to each other  
921 stage. FDR (adjP) values are presented as Min and Max values of the different comparisons.

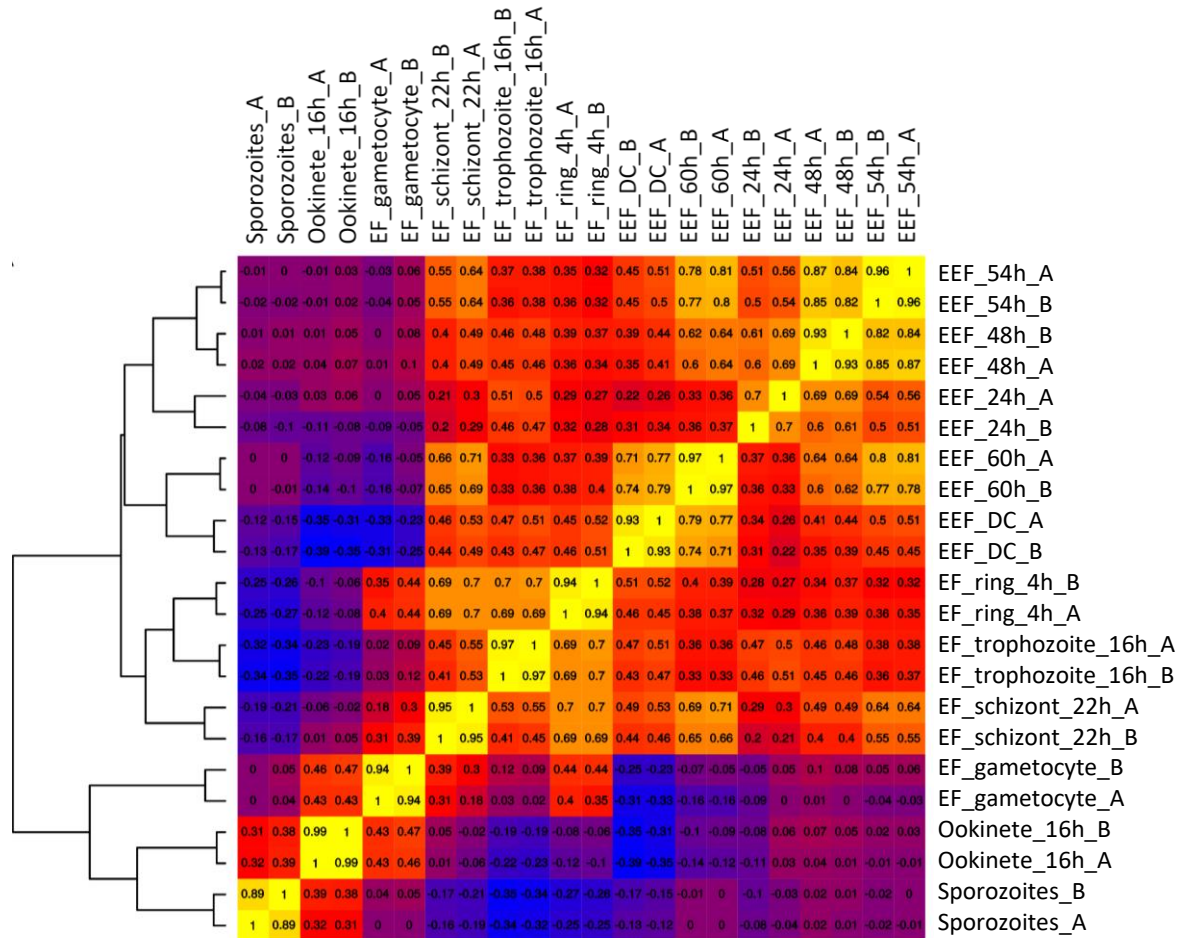

922

923 **Figure 1:** Clustering of samples of different life cycle stages based on genes with the highest  
 924 overall high variance (90th percentile, Spearman correlation and hierarchical clustering).  
 925 Stages are sporozoites, exo-erythrocytic (EEF) stages (DC are detached cells), erythrocytic  
 926 (EF) stages (rings, trophozoites, schizonts, gametocytes) and ookinetes. \_A, \_B: Biological  
 927 replicates. Heatmap was generated using normalized and log<sub>2</sub>(x+1)-transformed gene  
 928 expression values (74). Heatmap drawn with the R-package gplots (108).

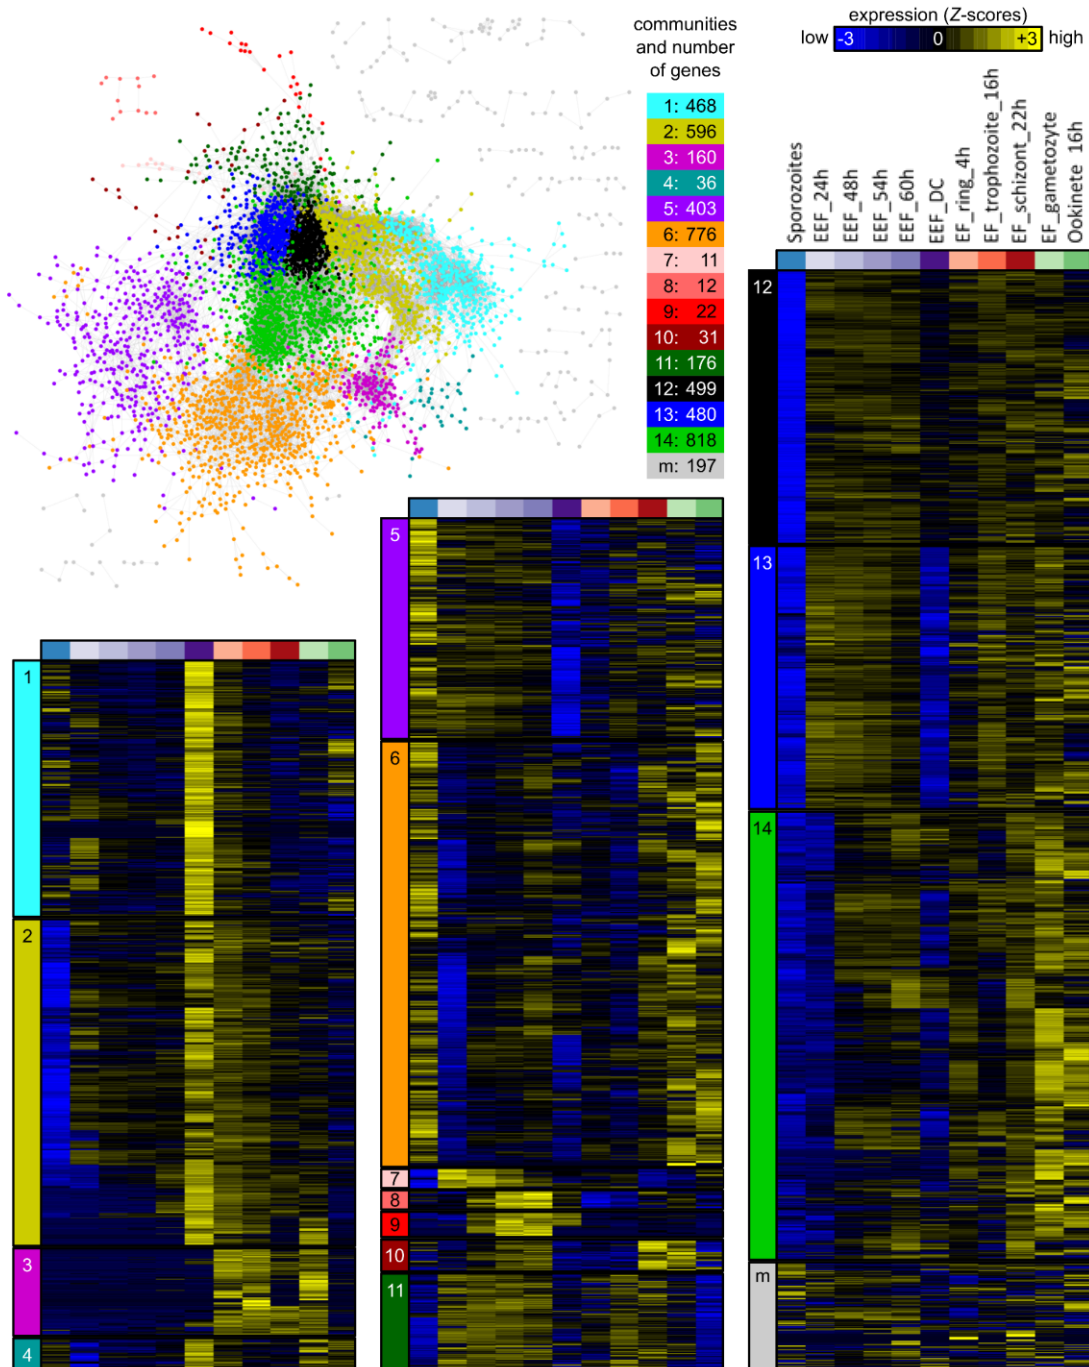

952 **Figure 2:** Gene co-expression network based on RNA-seq data of samples of different life  
953 cycle stages. Stages are sporozoites, exo-erythrocytic (EEF) stages (DC are detached cells),  
954 erythrocytic (EF) stages (rings, trophozoites, schizonts, gametocytes) and ookinetes. Each  
955 node represents a gene and each edge depicts a significant pairwise correlation. The  
956 network was visualized with Cytoscape (77) using the "prefuse force directed layout".  
957 Nodes/genes are colored according to their membership in 14 communities and a 'mixed'  
958 (M) community (pool of communities with less than 11 genes per community), identified  
959 with a modularity optimization algorithm (38). For each community, a heatmap summarizes  
960 the expression patterns of all genes within the community. Expression values in the  
961 heatmaps correspond to gene-wise Z-scored of normalized and  $\log_2(x+1)$ -transformed count  
962 data averaged across the replicates.

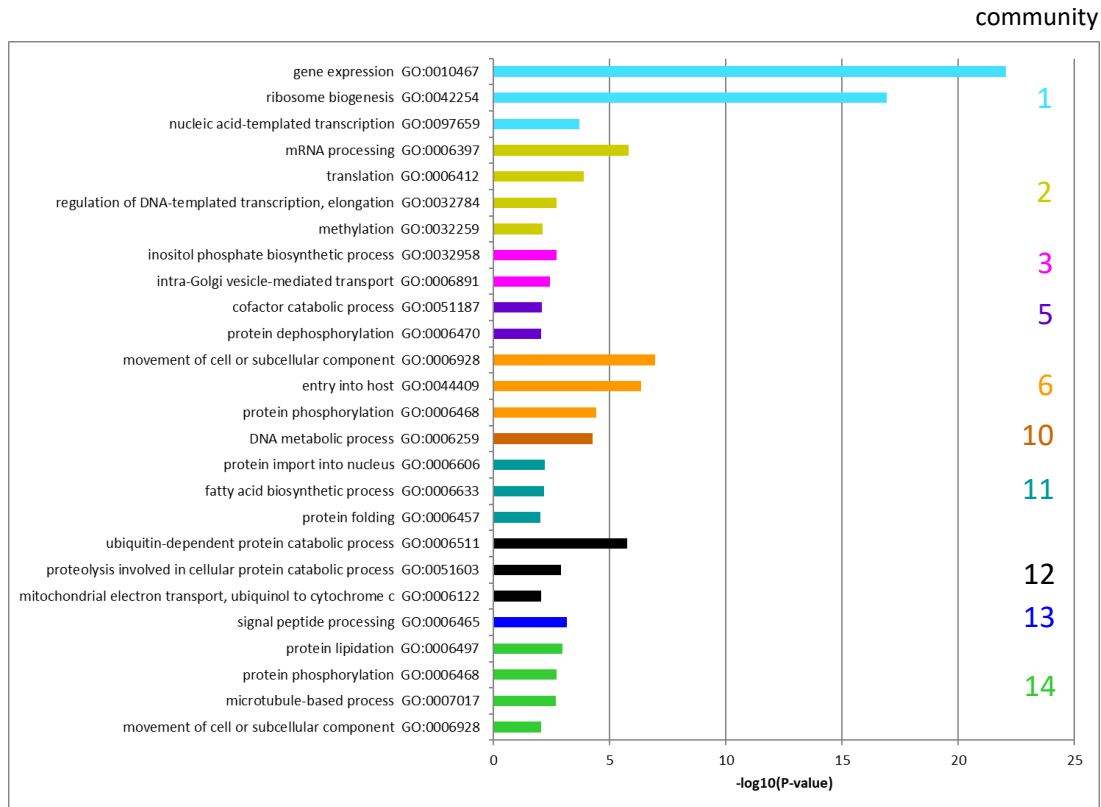

963

964 **Figure 3:** GO terms in GCN communities (expressed as  $-\log_{10}(P\text{-value})$ ). The colors refer to  
 965 the different communities in Fig1 B. Only GO-terms with p-values  $< 0.01$  were included.  
 966 Communities containing less than 25 genes were ignored because of potential false  
 967 significance (following recommendations in GeneSetEnrichmentAnalysis from the Broad  
 968 Institute).

969



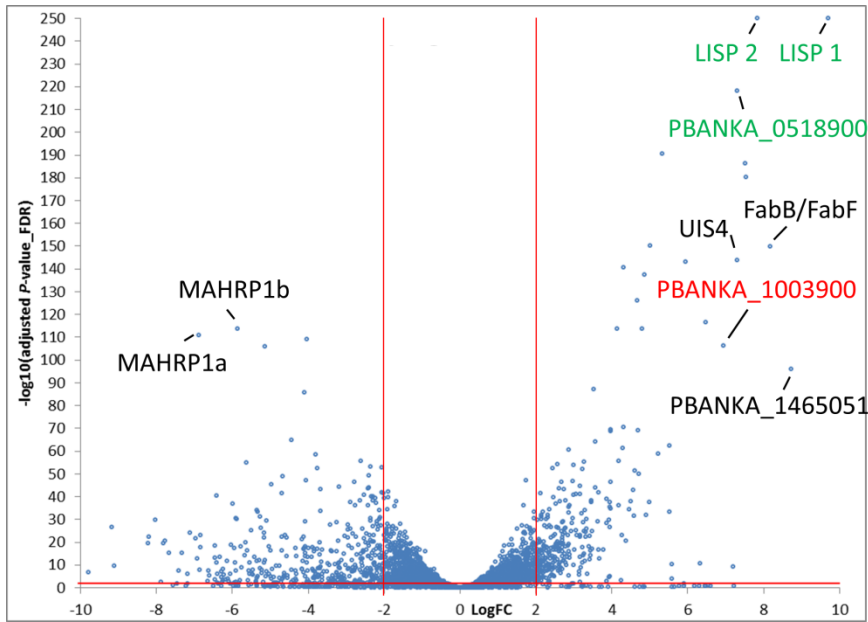

970

971 **Figure 4:** Volcano plot of differentially expressed genes of developing exo-erythrocytic (EEF)  
972 stages (EEF\_24h-60h) compared to developing erythrocytic stages (EF\_ring,  
973 EF\_trophozoites). In this analysis the DC and schizonts stages are not included. The graph  
974 shows LogFC values relative to FDR ( $-\log_{10}(\text{adjusted P-value})$ ). Positive LogFC values  
975 represent preferentially EEF stage expressed genes. Negative LogFC values represent  
976 preferentially EF stage genes. Genes in green and red show highest expression in liver stages  
977 compared to all other stages (including sporozoites, gametocytes and ookinetes).

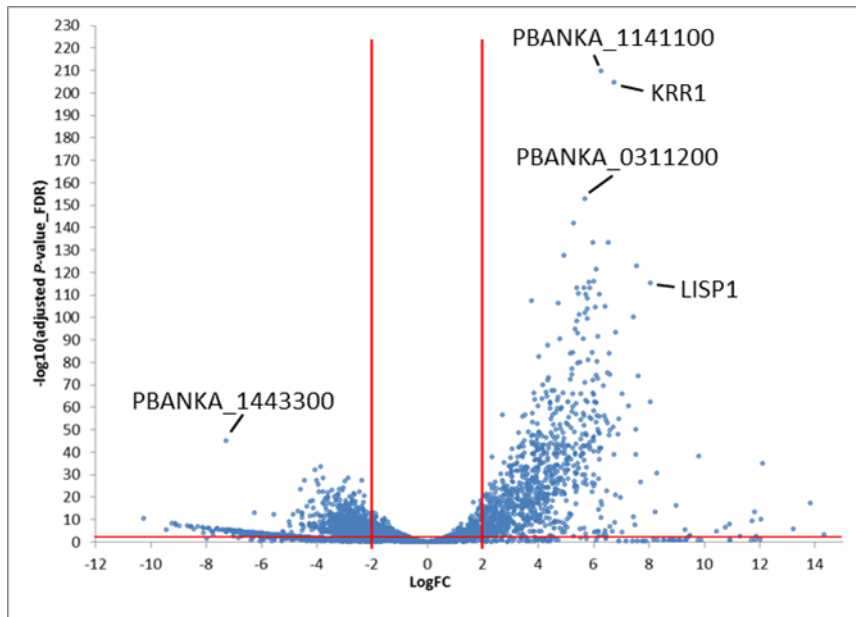

987 **Figure 5:** Volcano plot of differentially expressed genes of detached cells (DC) compared to EF  
988 schizonts (sample 22h). Positive LogFC values represent preferentially DC expressed genes.  
989 Negative LogFC values represent preferentially EF schizont expressed genes. The graph  
990 shows LogFC values relative to FDR ( $-\text{Log}_{10}(\text{adjusted } P\text{-value})$ ).

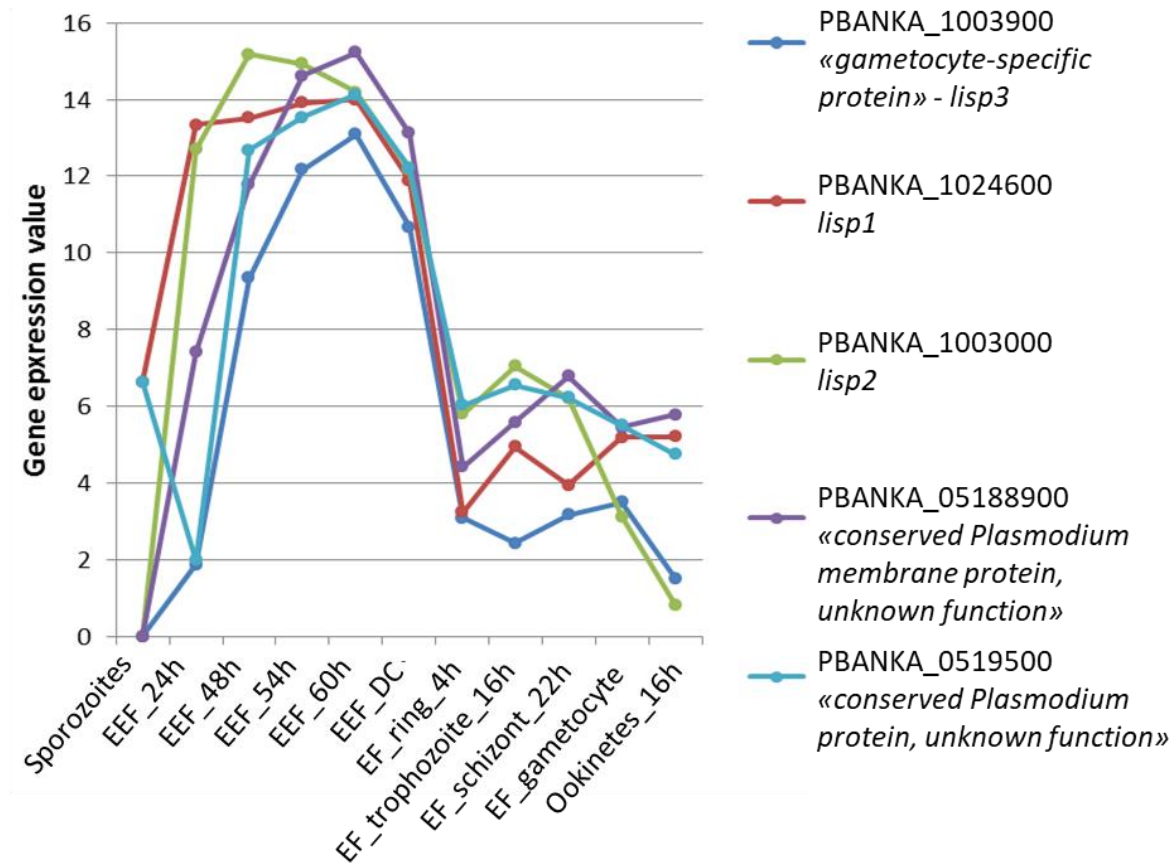

991

992 **Figure 6:** Expression profiles of the top 5 genes predominantly expressed in exo-erythrocytic  
993 stages compared to all other stages. Gene expression values corresponding to normalized  
994 and  $\log_2(x+1)$ -transformed read counts. The data were normalized with DESeq2 (with  
995 default parameters)(74).

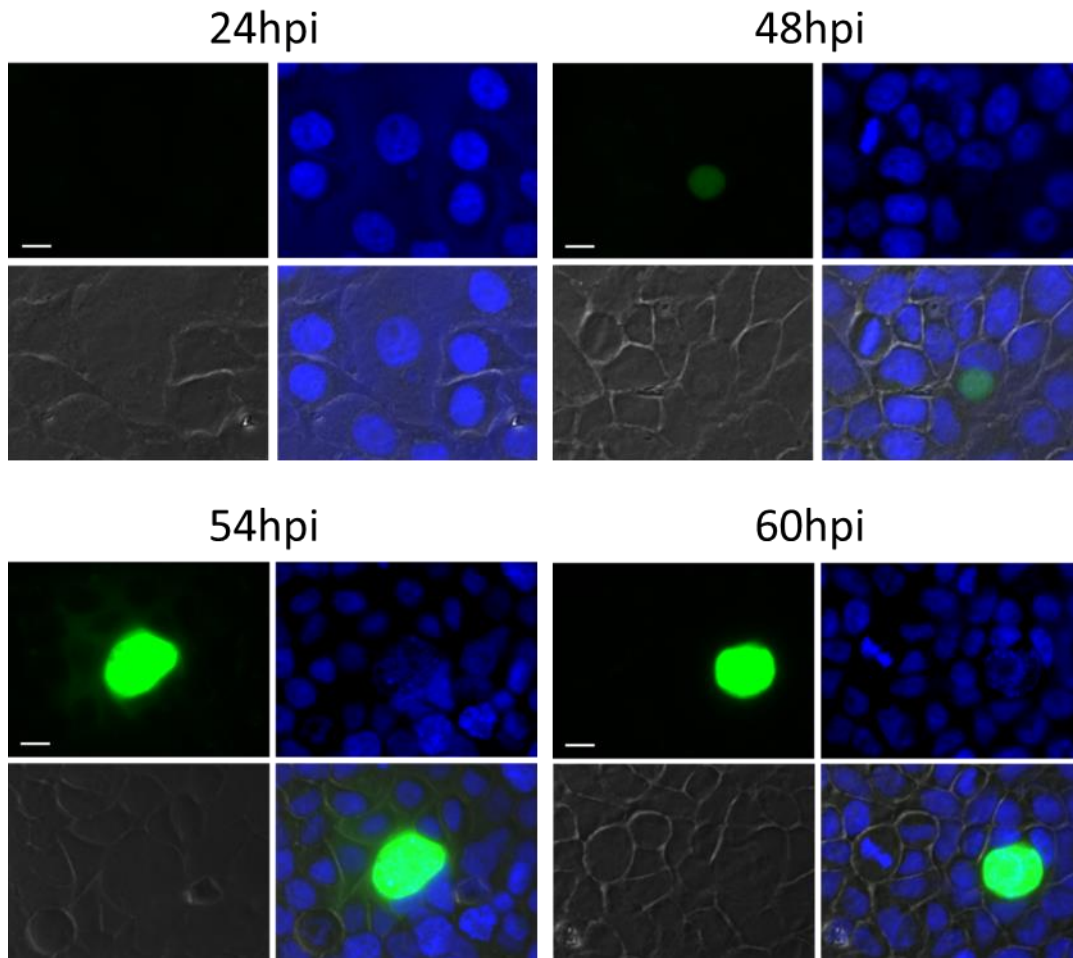

996

997 **Figure 7:** GFP expression during EEF stage development of the transgenic line 300 expressing  
998 GFP under control of the promoter region of PBANKA\_1003900 (PBANKA\_1003900<sup>GFP</sup>).  
999 Infected HeLa cells were fixed with 4%PFA/PBS at indicated times post infection with  
1000 sporozoites. Nuclei were stained with Hoechst. Microscopy-settings (e.g. exposure time)  
1001 were kept the same for all samples (bar 10µm).
